# Supplementary material for: Genome-wide detection of CRISPR editing in vivo using GUIDE-tag
Source: PubMed Central journal article supplement (PMC8782884; doi:10.1038/s41467-022-28135-9), 2022-01-21

## Supplementary Information

### Genome-wide Detection of CRISPR editing *in vivo* using GUIDE-tag

Shun-Qing Liang<sup>1¶</sup>, Pengpeng Liu<sup>2¶</sup>, Jordan L. Smith<sup>1</sup>, Esther Mintzer<sup>2</sup>, Stacy Maitland<sup>2</sup>, Xiaolong Dong<sup>1</sup>, Qiyuan Yang<sup>2</sup>, Jonathan Lee<sup>1</sup>, Cole M. Haynes<sup>2</sup>, Lihua Julie. Zhu<sup>2,3,4</sup>, Jonathan K. Watts<sup>1</sup>, Erik J. Sontheimer<sup>1,3,5</sup>, Scot A. Wolfe<sup>2,5\*</sup>, Wen Xue<sup>1,2,3,5\*</sup>

<sup>1</sup>RNA Therapeutics Institute, University of Massachusetts Medical School, Worcester, MA, USA;

<sup>2</sup>Department of Molecular, Cell and Cancer Biology, University of Massachusetts Medical School, Worcester, MA, USA.

<sup>3</sup>Department of Molecular Medicine, University of Massachusetts Medical School, Worcester, Massachusetts, USA.

<sup>4</sup>Program in Bioinformatics and Integrative Biology, University of Massachusetts Medical School, Worcester, Massachusetts, USA.

<sup>5</sup>Li Weibo Institute for Rare Diseases Research, University of Massachusetts Medical School, Worcester, MA, USA

¶Equal contribution to this study

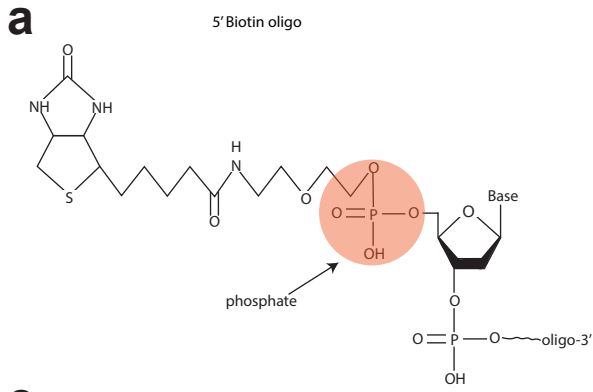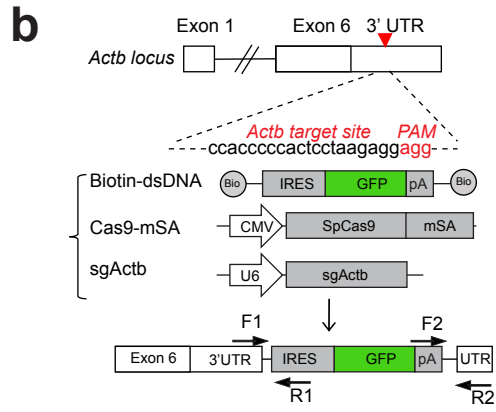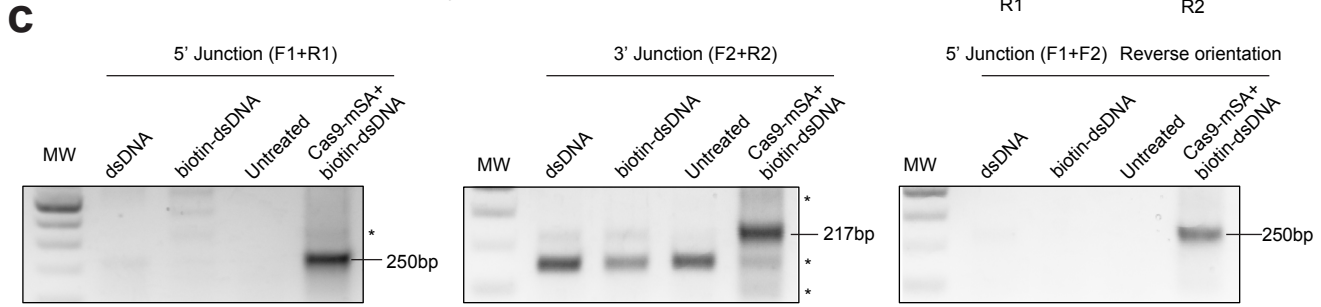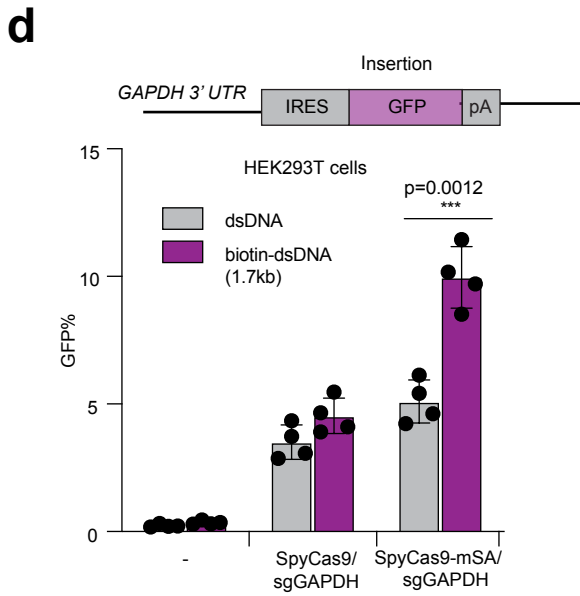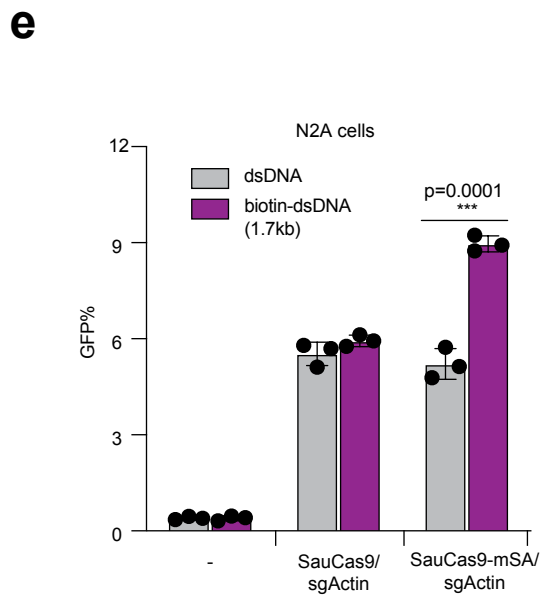

**f**

biotin-dsDNA + Cas9-mSA + sgActin

biotin-dsDNA

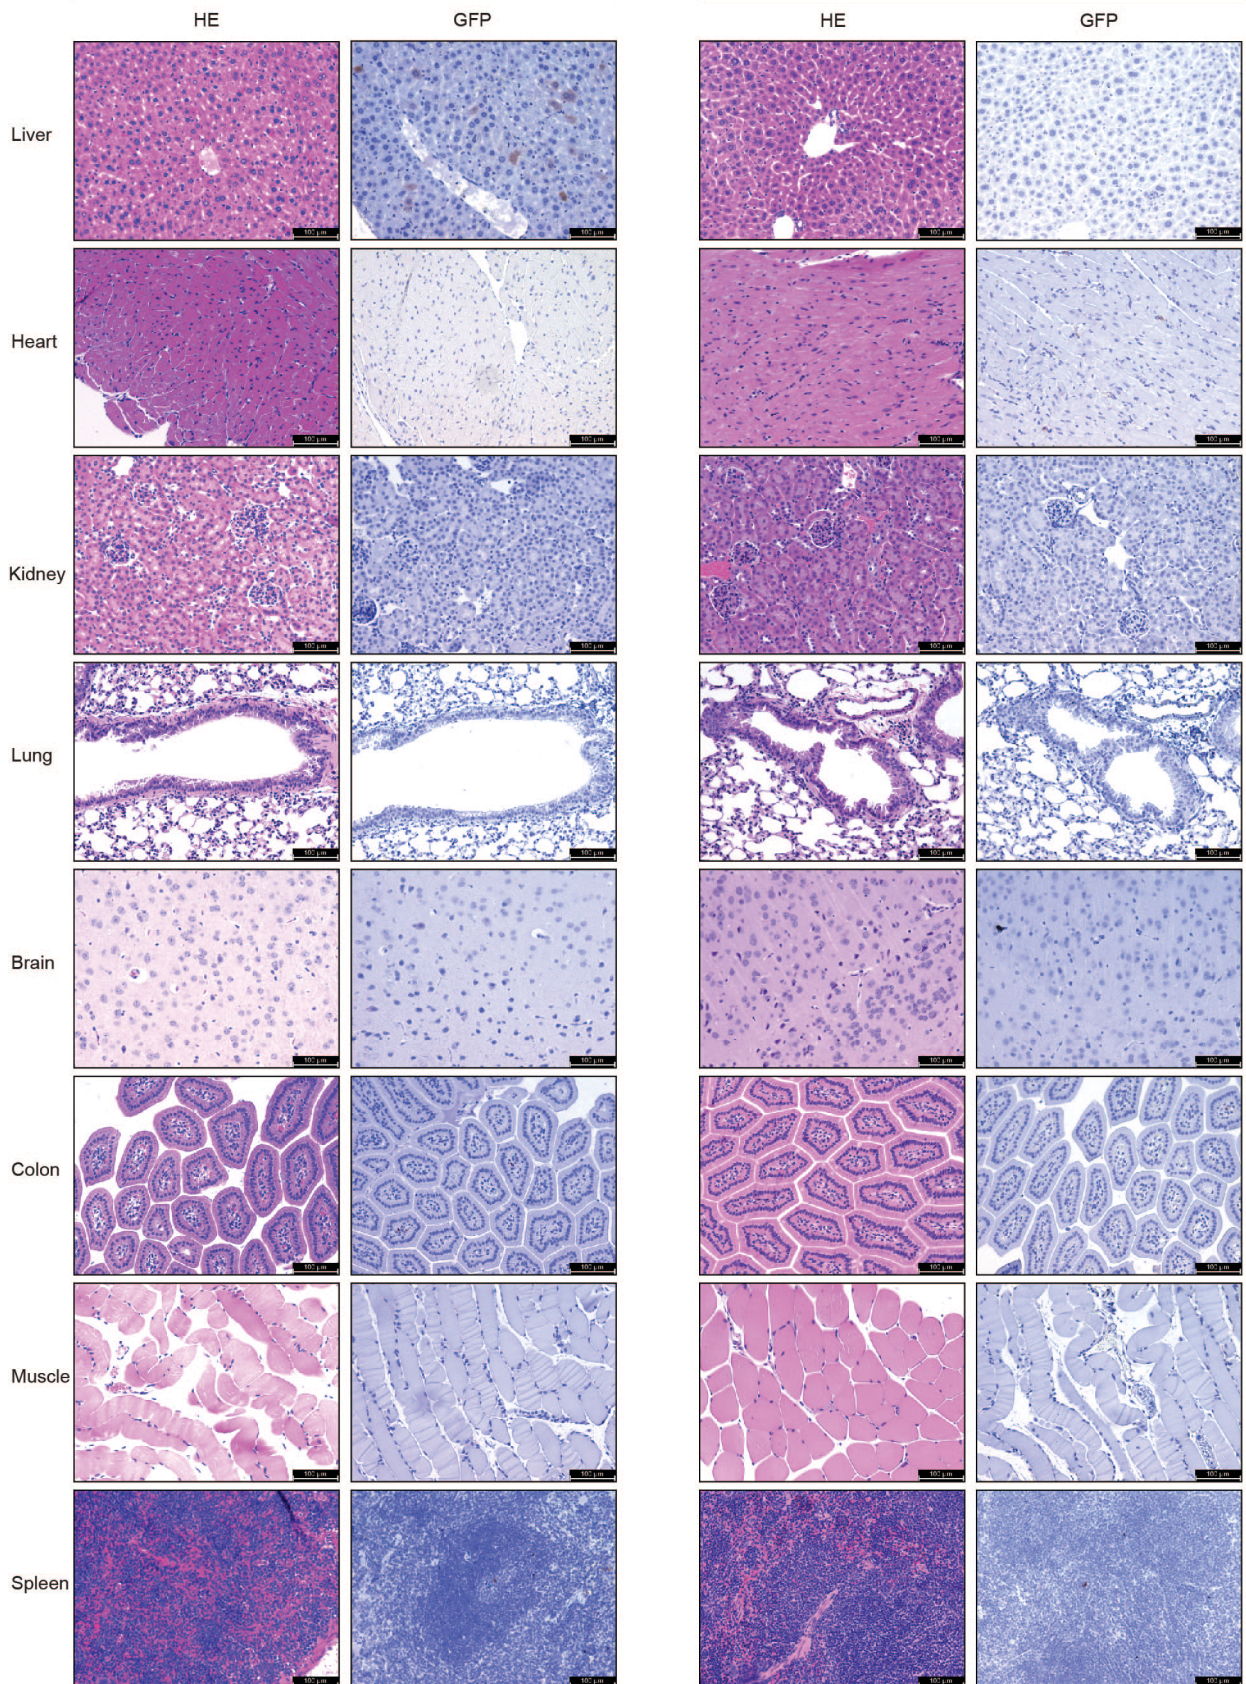

**Supplementary Figure 1. Tethering SpyCas9-mSA with biotin-dsDNA donor enables efficient cassette insertion in N2A cells.**

**a**, Structure of 5'biotin modified oligo from IDT.

**b**, Schematic of *Actb* locus target site and editing constructs used for cassette insertion. Bracket indicates expression constructs and tagging DNA introduced by HTVI.

**c**, Genomic DNA was collected from N2A cells transfected with biotin-donor and Cas9-mSA/sgRNA expression vector or controls. PCR was performed with indicated primers in (b) to amplify the 5' junction sites and 3' junction site for insertions in different orientations. Results were obtained from four independent experiments. The size of expected PCR bands is indicated. \* denotes unspecific bands. MW, molecular weight.

**d**, SpyCas9-mSA increases biotin-dsDNA donor insertion rate at GAPDH 3' UTR. 293T cells were transfected with IRES-GFP donor (dsDNA or biotin-dsDNA) with nucleases (SpyCas9/sgRNA or SpyCas9-mSA/sgRNA expression vector). Flow cytometry analysis was performed 4 days after transfection. Results were obtained from four independent experiments and presented as mean  $\pm$  SEM. \*\*\* $P < 0.001$  by one-way ANOVA with Tukey's multiple comparisons test.

**e**, Mouse N2A cells were transfected with IRES-GFP donor (dsDNA or biotin-dsDNA) in the absence or presence of various nucleases (SauCas9/sgRNA or SauCas9-mSA/sgRNA expression vector). Flow cytometry analysis was performed 4 days after transfection. Biotin-dsDNA with SauCas9-mSA increases GFP+ cell % compared to unmodified dsDNA. Results were obtained from three independent experiments and presented as mean  $\pm$  SEM. \*\*\* $P < 0.001$  by two-way ANOVA with Tukey's multiple comparisons test. "-" denotes donor only controls.

**f**, Treatment with Biotin-dsDNA with SpyCas9-mSA increases insertion efficacy compared to unmodified dsDNA in liver. Hematoxylin and eosin, and immunohistochemistry analysis (GFP) of mouse tissue at day 7 after injection. Mice (n=3 per group) were treated with either biotin-dsDNA donor (4 $\mu$ g) or biotin-donor (4 $\mu$ g) with SpyCas9-mSA/sg*Actb* (20 $\mu$ g). Scale bar is 100  $\mu$ m.

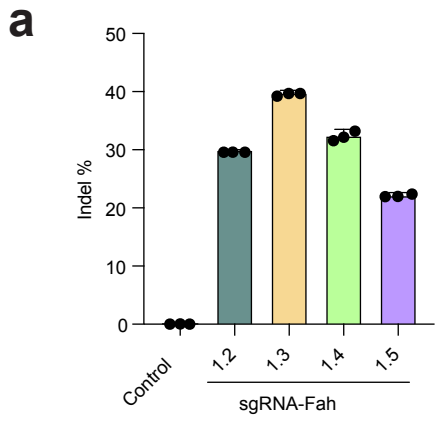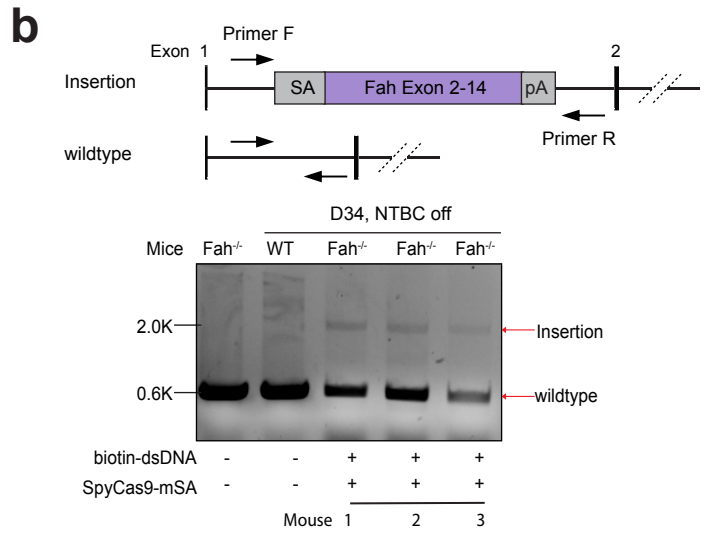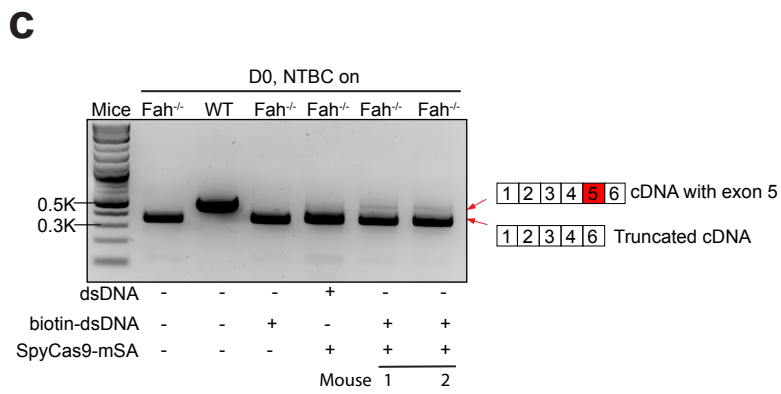

**Supplementary Figure 2. Insertion of *Fah* exon 2-14 repair cassette in mouse liver.**

**a,** Tracking of indels by DEcomposition (TIDE) analysis of SpyCas9 editing efficiency for 4 different sgRNAs targeting intron 1 of *Fah*. sg1.3 was chosen for *in vivo* analysis. Results were obtained from three independent experiments and presented as mean  $\pm$  SEM.

**b,** Genomic DNA was collected from NTBC off D34 mice. PCR was performed with indicated primers to amplify the genomic locus targeted for cassette insertion. The upper 2kb bands (n=3 mice) represent either the forward or reverse insertion of *Fah* donor.

**c,** RT-PCR detects a small fraction of *Fah* transcripts containing exon 5 in NTBC on D0 mice (n=2). mRNA was collected from mice injected with indicated reagent combinations. *Fah* RT-PCR was performed using primers spanning exon 1 to exon 6.

**a**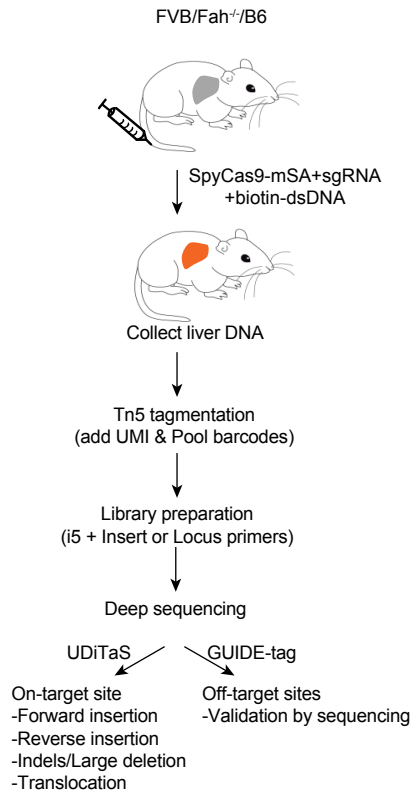**b**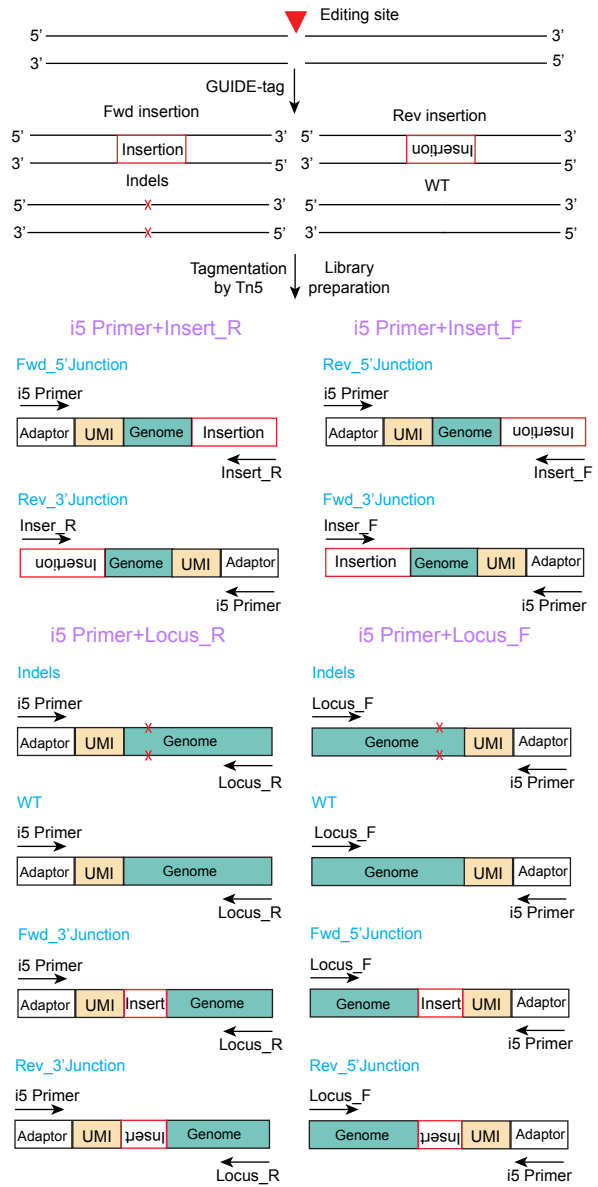

**Supplementary Figure 3. Overview of GUIDE-tag and UDiTaS.**

**a**, Schematic of GUIDE-tag and UDiTaS procedure that was performed in three different mouse strains using SpyCas9-mSA with different sgRNAs and different biotinylated donor DNAs. Genomic DNA was isolated and GUIDE-tag or UDiTaS libraries was prepared (see Methods).

**b**, Schematic overview of GUIDE-tag and UDiTaS amplification methods to create Illumina sequencing libraries, which differ based on the primer viewpoint that is utilized (tag-specific or locus specific). Target regions are amplified with i5 Primer and target-specific primers: Insertion forward or reverse (Insert\_F and R) for GUIDE-tag, or locus genomic forward or reverse (Locus\_F or R) for UDiTaS.



**a**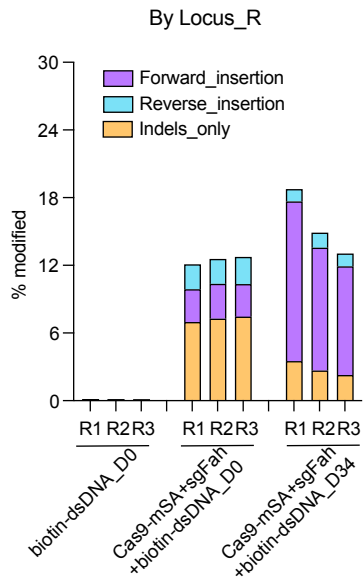**b**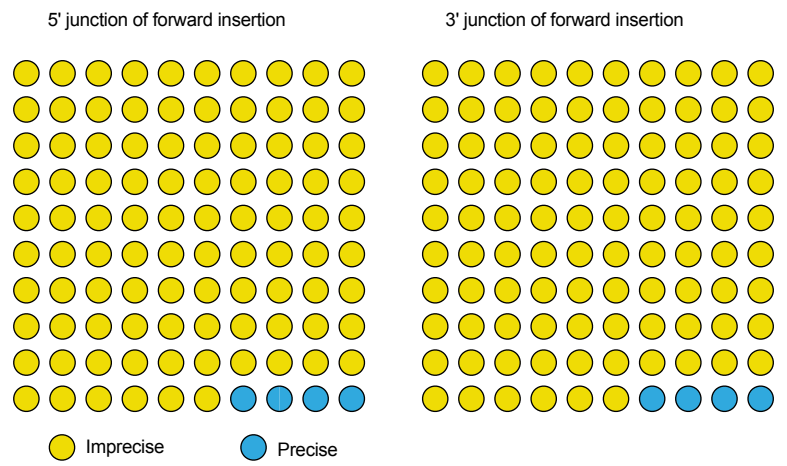

C

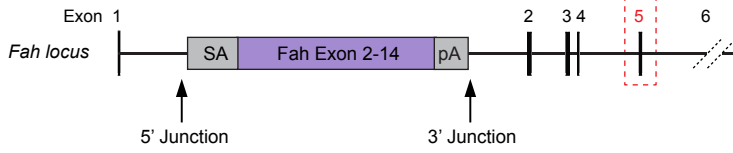

Reference Sequence

5' AATGACTTAAATACAATTGCTAGGCCTTGTTTCACATATAACTAGGCAGATAATGCCTATGATCAGGTCAGAGAGGAC 3'

Fah donor sequence

5' TTGTCTCAAAGGAAACCATGAGTCCCTAAGTATTTGCTGTTATAGTAAATGTG.....TAAACAAGTTAAACAACAACAATTGCATTCTTTTATGTTTCAGGTTTCAGGGGG 3'

Splice Acceptor

AATGACTTAAATACAATTGCTAGGCCTTGTTTCACATATAACTAGGCAGATAATGCCTATGATCAGGTCAGAGAGGAC WT 85.3%

Indels

|                                                                                 |     |       |
|---------------------------------------------------------------------------------|-----|-------|
| AATGACTTAAATACAATTGCTAGGCCTTGTTTCACATATA--CTAGGCAGATAATGCCTATGATCAGGTCAGAGAGGAC | -1  | 2.98% |
| AATGACTTAAATACAATTGCTAGGCCTTGTTTCACATATAaACTAGGCAGATAATGCCTATGATCAGGTCAGAGAGGAC | +1  | 0.95% |
| AATGACTTAAATACAATTGCTAGGCCTTGTTTCACATA---CTAGGCAGATAATGCCTATGATCAGGTCAGAGAGGAC  | -3  | 0.77% |
| AATGACTTAAATACAATTGCTAGGCCTTGTTTCACATA--ACTAGGCAGATAATGCCTATGATCAGGTCAGAGAGGAC  | -2  | 0.56% |
| AATGACTTAAATACAATTGCTAGGCCTTGTTTCAC-----TAGGCAGATAATGCCTATGATCAGGTCAGAGAGGAC    | -7  | 0.36% |
| AATGACTTAAATACAATTGCTAGGCCTTGTTTCACATA-----GGCAGATAATGCCTATGATCAGGTCAGAGAGGAC   | -6  | 0.33% |
| AATGACTTAAATACAATTGCTAGGCCTTGTTTCACA-----ACTAGGCAGATAATGCCTATGATCAGGTCAGAGAGGAC | -4  | 0.28% |
| AATGACTTAAATACAATTGCTAGGCCTTGT-----ACTAGGCAGATAATGCCTATGATCAGGTCAGAGAGGAC       | -9  | 0.21% |
| AATGACTTAAATACAATTGCTAGGCCTTGTTTCACATATA--TAGGCAGATAATGCCTATGATCAGGTCAGAGAGGAC  | -2  | 0.18% |
| AATGACTTAAATACAATTGCTAGGCCTTGTTTCACATATA--GGCAGATAATGCCTATGATCAGGTCAGAGAGGAC    | -4  | 0.18% |
| AATGACTTAAATACAATTGCTAGGCCTTGTTTCACATATAaaCTAGGCAGATAATGCCTATGATCAGGTCAGAGAGGAC | +2  | 0.15% |
| AATGACTTAAATACAATTGCTAGGCCTTGTT-----ACTAGGCAGATAATGCCTATGATCAGGTCAGAGAGGAC      | -8  | 0.14% |
| AATGACTTAAATACAATTGCTAGGC-----AGATAATGCCTATGATCAGGTCAGAGAGGAC                   | -21 | 0.12% |
| AATGACTTAAATACAATTGCTAGGCCTTGTTCA-----GGTCAGAGAGGAC                             | -31 | 0.08% |
| AATGACTTAAATACAATTGCTAGGCCTTGTTTCACATATA-----TGCCATGATCAGGTCAGAGAGGAC           | -12 | 0.05% |

5' junction site

|                                          |                                                       |           |       |
|------------------------------------------|-------------------------------------------------------|-----------|-------|
| AATGACTTAAATACAATTGCTAGGCCTTGTTTCACATATA | TTGTCTCAAAGGAAACCATGAGTCCCTAAGTATTTGCTGTTATAGTAAAT    | precise   | 0.08% |
| AATGACTTAAATACAATTGCTAGGCCTTG-----       | -----TCTCAAAGGAAACCATGAGTCCCTAAGTATTTGCTGTTATAGTAAAT  | imprecise | 0.73% |
| AATGACTTAAATACAATTGCTAGGCCTTGTTTCACATA-- | TTGTCTCAAAGGAAACCATGAGTCCCTAAGTATTTGCTGTTATAGTAAAT    | imprecise | 0.51% |
| AATGACTTAAATACAATTGCTAGGCCTTGTTTCACATATA | agcaatTTGTCTCAAAGGAAACCATGAGTCCCTAAGTATTTGCTGTTA      | imprecise | 0.44% |
| AATGACTTAAATACAATTGCTAGGCCTTG-----       | -----TGAGTCCCTAAGTATTTGCTGTTATAGTAAAT                 | imprecise | 0.38% |
| AATGACTTAAATACAATTGCTAGGCCTTGTTCA-----   | -----GAGTCCCTAAGTATTTGCTGTTATAGTAAAT                  | imprecise | 0.22% |
| AATGACTTAA-----                          | -----TCCTAAGTATTTGCTGTTATAGTAAAT                      | imprecise | 0.18% |
| AATGACTTAAATACAATTGCTAGGCCTTGTTTCACATATA | catTTGTCTCAAAGGAAACCATGAGTCCCTAAGTATTTGCTGTTATAGTAAAT | imprecise | 0.16% |
| AATGACTTAAATACAATTGCT-----               | -----AAACCATGAGTCCCTAAGTATTTGCTGTTATAGTAAAT           | imprecise | 0.12% |
| AATGACTTAAATACAATTGCTAGGCCTTGTTTCACATATA | atTTGTCTCAAAGGAAACCATGAGTCCCTAAGTATTTGCTGTTATAGTAAAT  | imprecise | 0.12% |
| AATGACTTAAATACAATTGCTAGGCCTTG-----       | -----CTGTTATAGTAAAT                                   | imprecise | 0.08% |
| AATGACTTAAATACAATTGCTAGGCCTTGTTTCAC----- | -----GAAACCATGAGTCCCTAAGTATTTGCTGTTATAGTAAAT          | imprecise | 0.06% |
| AATGACTTAAATACAATTGCTAGGC-----           | -----GAAACCATGAGTCCCTAAGTATTTGCTGTTATAGTAAAT          | imprecise | 0.05% |

Splice Acceptor

3' junction site

|                                                      |                                              |           |       |
|------------------------------------------------------|----------------------------------------------|-----------|-------|
| AACAAGTTAAACAACAACAATTGCATTCAATTTATGTTTCAGGTTTCAGGGG | ACTAGGCAGATAATGCCTATGATCAGGTCAGAGAGGAC       | precise   | 0.07% |
| AACAAGTTAAACAACAACAATTGCATTCAATTTATGTTTCAGGTTTCAGGGG | actACTAGGCAGATAATGCCTATGATCAGGTCAGAGAGGAC    | imprecise | 0.66% |
| AACAAGTTAAACAACAACAATTGCATTCAATTTATGTTTCAGGTTTCAGGGT | -----ACTAGGCAGATAATGCCTATGATCAGGTCAGAGAGGAC  | imprecise | 0.41% |
| AACAAGTTAAACAACAACAATTGCATTCAATTTATGTTTCAGGTTTCAGGGG | acACTAGGCAGATAATGCCTATGATCAGGTCAGAGAGGAC     | imprecise | 0.32% |
| AACAAGTTAAACAACAACAATTGCATTCAATTTATGTTTCAGGTTTCAGG   | -----ACTAGGCAGATAATGCCTATGATCAGGTCAGAGAGGAC  | imprecise | 0.26% |
| AACAAGTTAAACAACAACAATTGCATTCAATTTATGTTTCAGGTTTCAGG   | -----ATAATGCCTATGATCAGGTCAGAGAGGAC           | imprecise | 0.23% |
| AACAAGTTAAACAACAACAATTGCATTCAATTTATGTTTCAGGTTTCAGG   | tactttACTAGGCAGATAATGCCTATGATCAGGTCAGAGAGGAC | imprecise | 0.19% |
| AACAAGTTAAACAACAACAATTGCATTCAATTTATGTTTCAGGTTTCAGG   | -----AGGCAGATAATGCCTATGATCAGGTCAGAGAGGAC     | imprecise | 0.15% |
| AACAAGTTAAACAACAACAATTGCATTCAATTTATGTTTCAGGTTTCAGG   | -----CAGAGAGGAC                              | imprecise | 0.12% |
| AACAAGTTAAACAACAACAATTGCATTCAATTTATGTTTCAGGTTTCAGGG  | gagACTAGGCAGATAATGCCTATGATCAGGTCAGAGAGGAC    | imprecise | 0.08% |
| AACAAGTTAAACAACAACAATTGCATTCAATTTATGTTTCAGGTTTCAGGG  | -----ATGATCAGGTCAGAGAGGAC                    | imprecise | 0.06% |
| AACAAGTTAAACAACAACAATTGCATTCAATTTATGTTTCAGGTTTCAGGG  | gtaaggaatgACTAGGCAGATAATGCCTATGATCAGG        | imprecise | 0.05% |

**Supplementary Figure 4. Deep sequencing analyses of 5' and 3' junctions of the insertion sites for Fah exon 2-14.**

**a**, UDiTaS analyses (Locus\_R primer) of editing at *Fah* locus. Genomic DNA was collected from NTBC on D0 and off D34 mice. R1, R2 and R3 are three mice.

**b**, Percentage of imprecise and precise insertion at 5' and 3' junction sites at *Fah* intron 1.

**c**, Sequences of the indels, 5' and 3' junction sites in *Fah* gene identified by UdiTaS after Fah exon 2-14 insertion. The sgRNA target sequence is underlined and PAM sequence is labeled in red. The black line indicates the Cas9 cleavage site. The sequence highlighted in pink indicates the donor sequence. The percentage listed to the right of each sequence is the UMI number associated with each sequence divided by total UMIs recovered from the library.

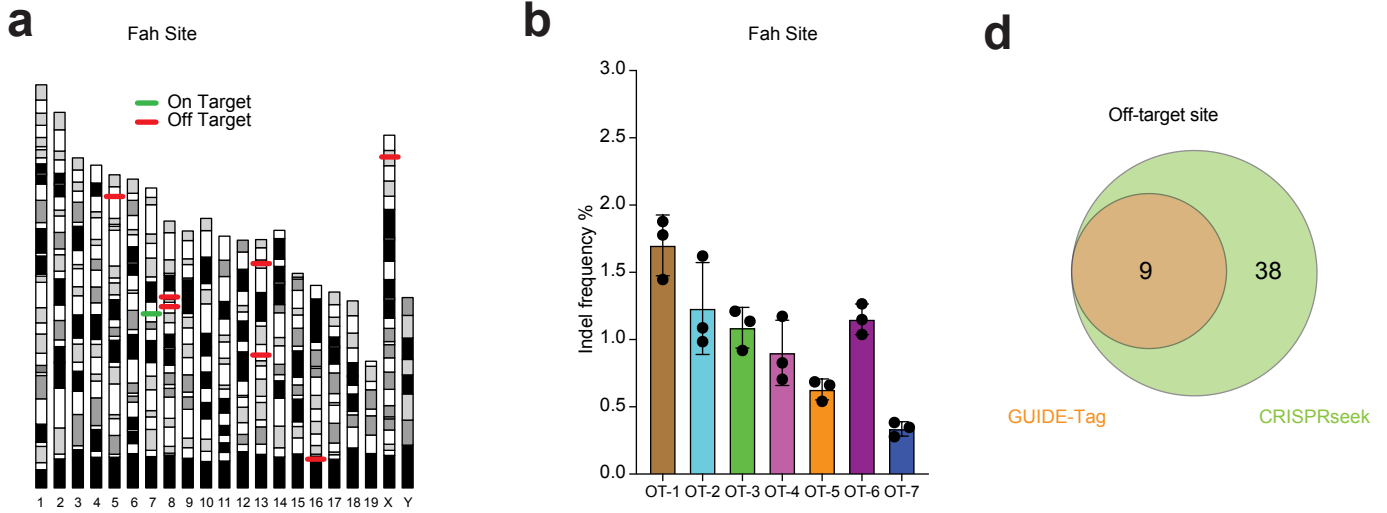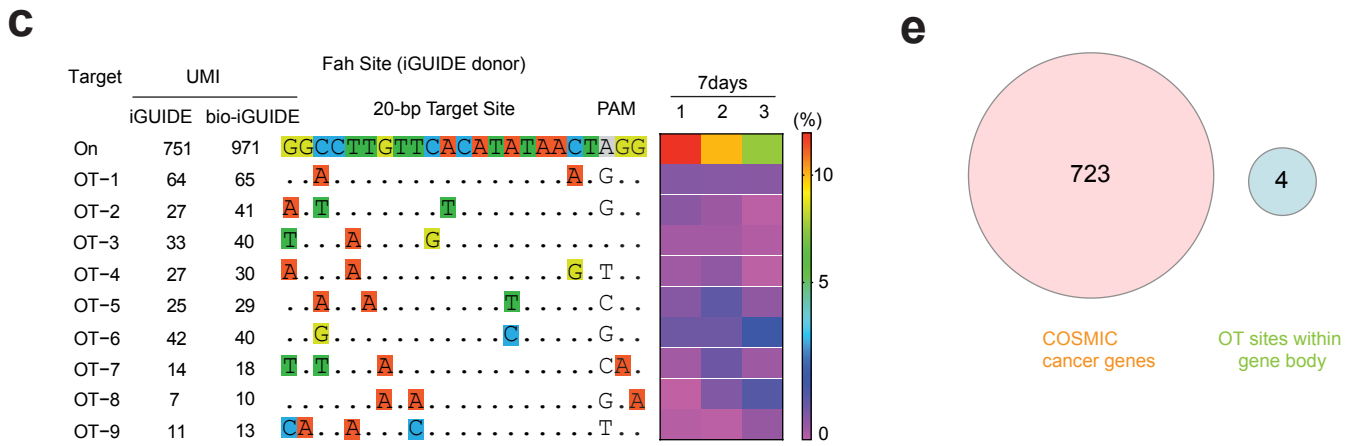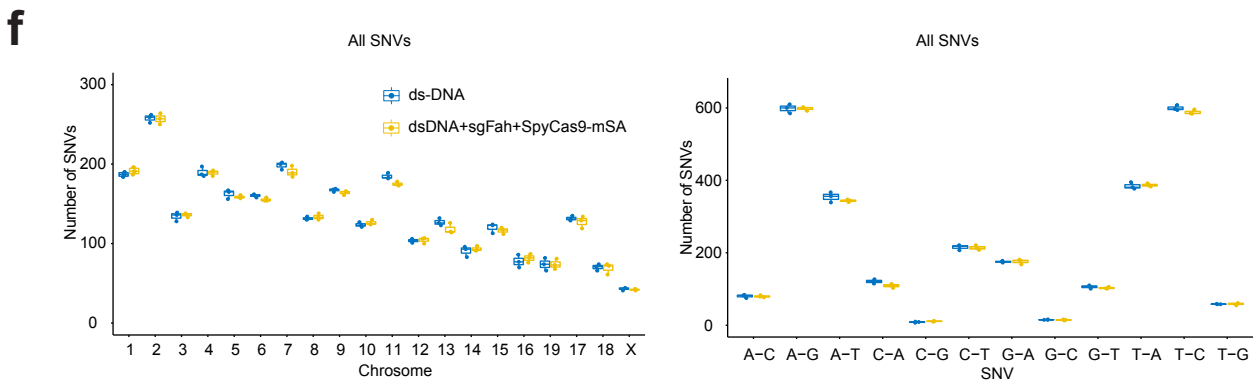

**Supplementary Figure 5. *in vivo* off-target analysis of sgFah by GUIDE-tag.**

**a**, chromosome diagram of GUIDE-tag on-target (green) and off-target (red) cassette insertions for SpyCas9-mSA sgFah with Fah exon 2-14 repair cassette.

**b**, indels frequency at Fah off-target sites (OT1-7) determined by targeted amplicon deep sequencing. Black dots (n=3) represent individual mice. Error bars are SEM.

**c**, *in vivo* off-target sites (OT1-9) identified by GUIDE-tag with iGUIDE/biotin-iGUIDE donor at Fah site. Mismatches to the Fah target site are shown in colored boxes. Indel frequencies determined by targeted amplicon sequencing from the liver of three mice are presented as a heat map (1,2,3 are three mice). Indel frequencies determined by targeted amplicon sequencing from the liver of three mice seven days after injection are presented as heat map.

**d**, Venn diagram of overlapping off-target sites identified by GUIDE-tag (9 validated loci) and CRISPRseek for sgFah.

**e**, Overlap between identified sgFah OT sites and COSMIC cancer gene list. Of the 9 sgFah OT sites, 4 sites are within gene body (all 4 are in introns). None of the 4 Fah intragenic OT sites overlap with known cancer genes (723 cancer genes in COSMIC v92).

**f**, Numbers and types of SNVs identified by WES in the biotin-dsDNA and sgFah+biotin-dsDNA+SpyCas9-mSA group. Each dot (n=3) represent individual mice. In the boxes, the top, middle and bottom lines represent the 25, 50 and 75 percentiles, respectively. Whiskers indicated the min and max percentiles and outliers are not shown.

**a**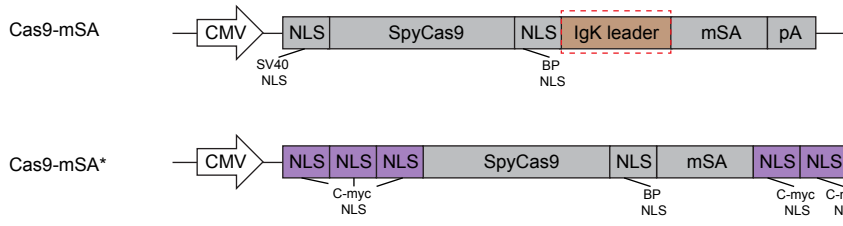**b**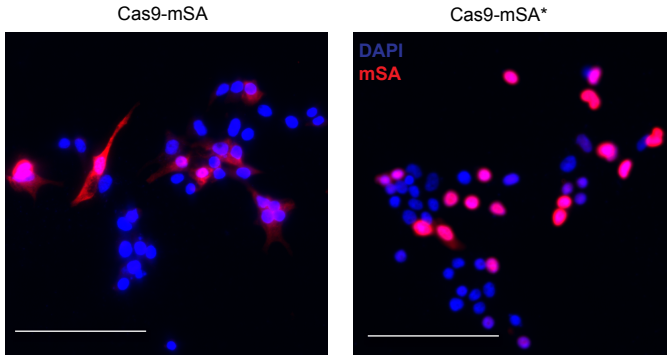**c**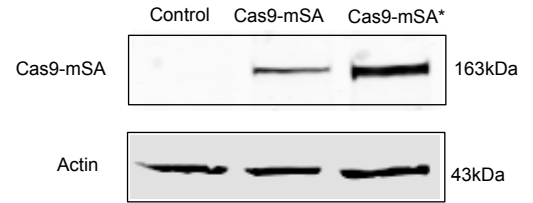**d**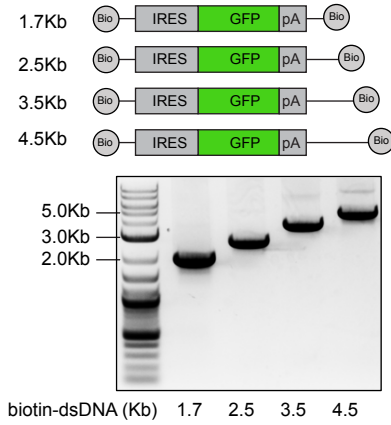**f**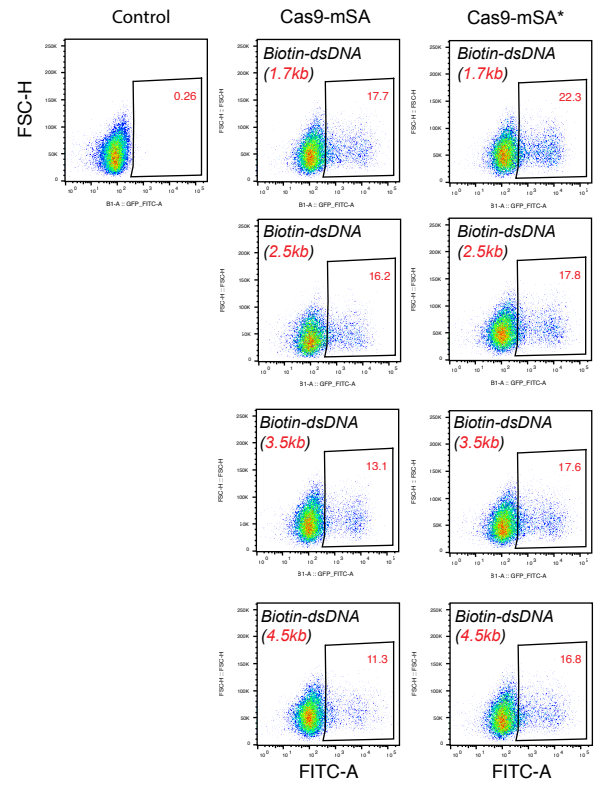**e**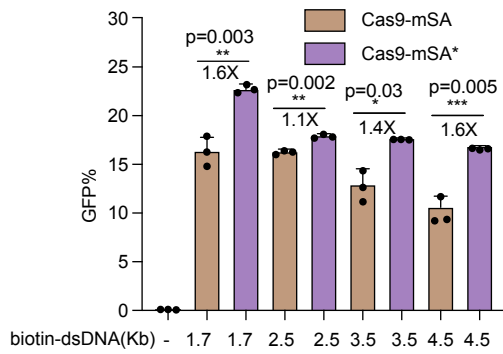

## Supplementary Figure 6. Optimization of SpyCas9-mSA improves insertion efficiency

**a**, Schematic representation of original SpyCas9-mSA and optimized SpyCas9-mSA\*. In SpyCas9-mSA\*, the Igk leader sequence was removed. Mammalian codon-optimized SpyCas9 and additional nuclear localization sequences were introduced.

**b**, N2A cells were transfected with original SpyCas9-mSA (300ng) or SpyCas9-mSA\* (300ng). Cells were subsequently stained with antibodies against mSA (Red) and DAPI (blue; nuclei). Scale bar (white): 100  $\mu$ m. Results were obtained from four independent experiments.

**c**, Immunoblots of N2A cells transfected with SpyCas9-mSA and SpyCas9-mSA\*. mSA antibody was used for detection of SpyCas9-mSA. Results were obtained from four independent experiments.

**d**, Different lengths of biotinylated IRES-GFP donors were generated by one-step PCR using biotinylated primers (Supplementary table 2). Results were obtained from four independent experiments.

**e**, SpyCas9-mSA\* improved insertion efficiency of biotinylated IRES-GFP donor cassettes. FACS analysis of functional cassette insertion events in N2A cells treated with either biotin-donor + SpyCas9-mSA, or biotin-donor + SpyCas9-mSA\* for the *Actb* locus. N2A cells plated in 12-well plate (30000/well) were transfected with 300ng of SpyCas9-mSA or SpyCas9-mSA\*, and 270fmol of each biotin-dsDNA. Flow cytometry analysis was performed 4 days after transfection. GFP<sup>+</sup>% are presented as mean  $\pm$  s.d. (n=3). \*\* $P$ <0.01, \*\*\* $P$ <0.001 by one-way ANOVA with Tukey's multiple comparisons test. Fold change (SpyCas9-mSA\* / SpyCas9-mSA) is indicated above the bars for each cassette length.

**f**, Representative flow cytometry plots in **e**.

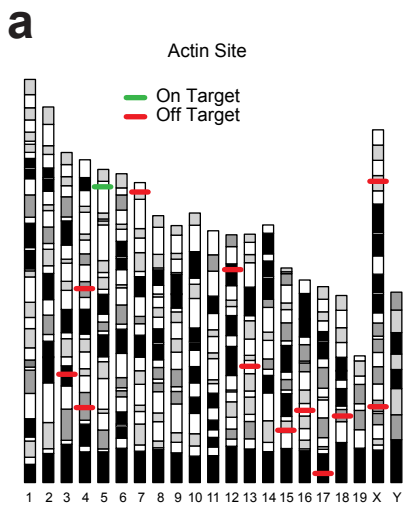

**b**

| Target | UMI      |           | Actin Site<br>20-bp Target Site | PAM | Indel %  |           |
|--------|----------|-----------|---------------------------------|-----|----------|-----------|
|        | Cas9-mSA | Cas9-mSA* |                                 |     | Cas9-mSA | Cas9-mSA* |
| On     | 1595     | 1902      | CCACCCCCACTCCTAAGAGGAGG         |     | 4.39     | 5.88      |
| OT-1   | 1237     | 1550      | .....                           |     | 4.93     | 5.73      |
| OT-2   | 1136     | 1572      | .....                           |     | 2.67     | 3.86      |
| OT-4   | 94       | 70        | .....                           |     | 0.20     | 0.28      |
| OT-5   | 72       | 64        | .....A.....A.....               |     | 1.11     | 1.39      |
| OT-6   | 20       | 23        | G.....A.....                    |     | 1.21     | 1.62      |
| OT-8   | 7        | 13        | .....T.T.....                   |     | 0.32     | 0.60      |
| OT-9   | 3        | 5         | .....C.....                     |     | 0.25     | 0.37      |
| OT-10  | 3        | 9         | .....A.....A.....               |     | 0.45     | 0.72      |
| OT-11  | 2        | 4         | .....T.....T.....CA.....        |     | 0.26     | 0.52      |
| OT-12  | 2        | 3         | .....A.....T.....AA.....        |     | 0.14     | 0.38      |

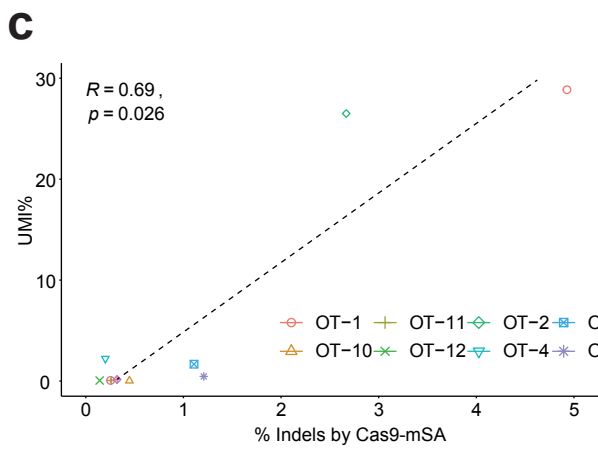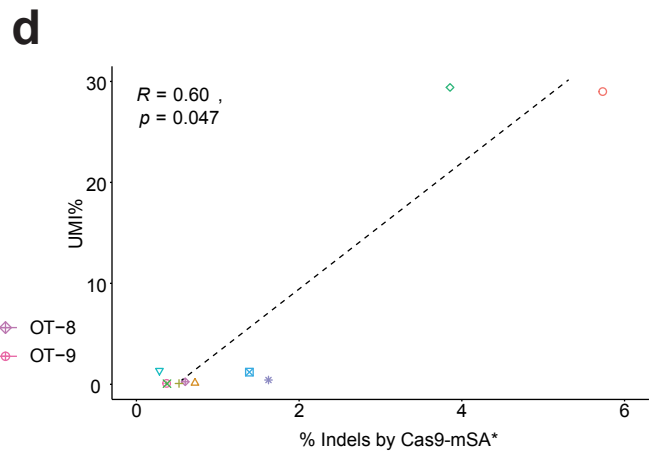



**Supplementary Figure 7. *In vivo* off-target analysis of *sgActb*.**

**a**, chromosome diagram of GUIDE-tag on-target (green) and off-target (red) insertions sites determined for SpyCas9-mSA with *sgActb*.

**b**, *in vivo* off-target sites (OT1-12) identified by GUIDE-tag with biotin-IRES-GFP donor at *Actb* site that have statistically significant indel rates. Mismatches to the *Actb* target site are shown in colored boxes. Average UMI (n=3 mice) numbers for each site are shown. Indel frequencies determined by targeted amplicon sequencing from the liver of three mice are indicated (average of three mice).

**c-d**, Scatter plots of UMI% by GUIDE-tag with Cas9-mSA (c) or Cas9-mSA\* (d) and indel frequency by amplicon sequencing for off-target cleavage sites. Dashed lines represent the linear regression fit (Spearman's correlation calculated). The p-value for Pearson's correlation coefficient was determined by the two-tailed t-distribution table.

**a**

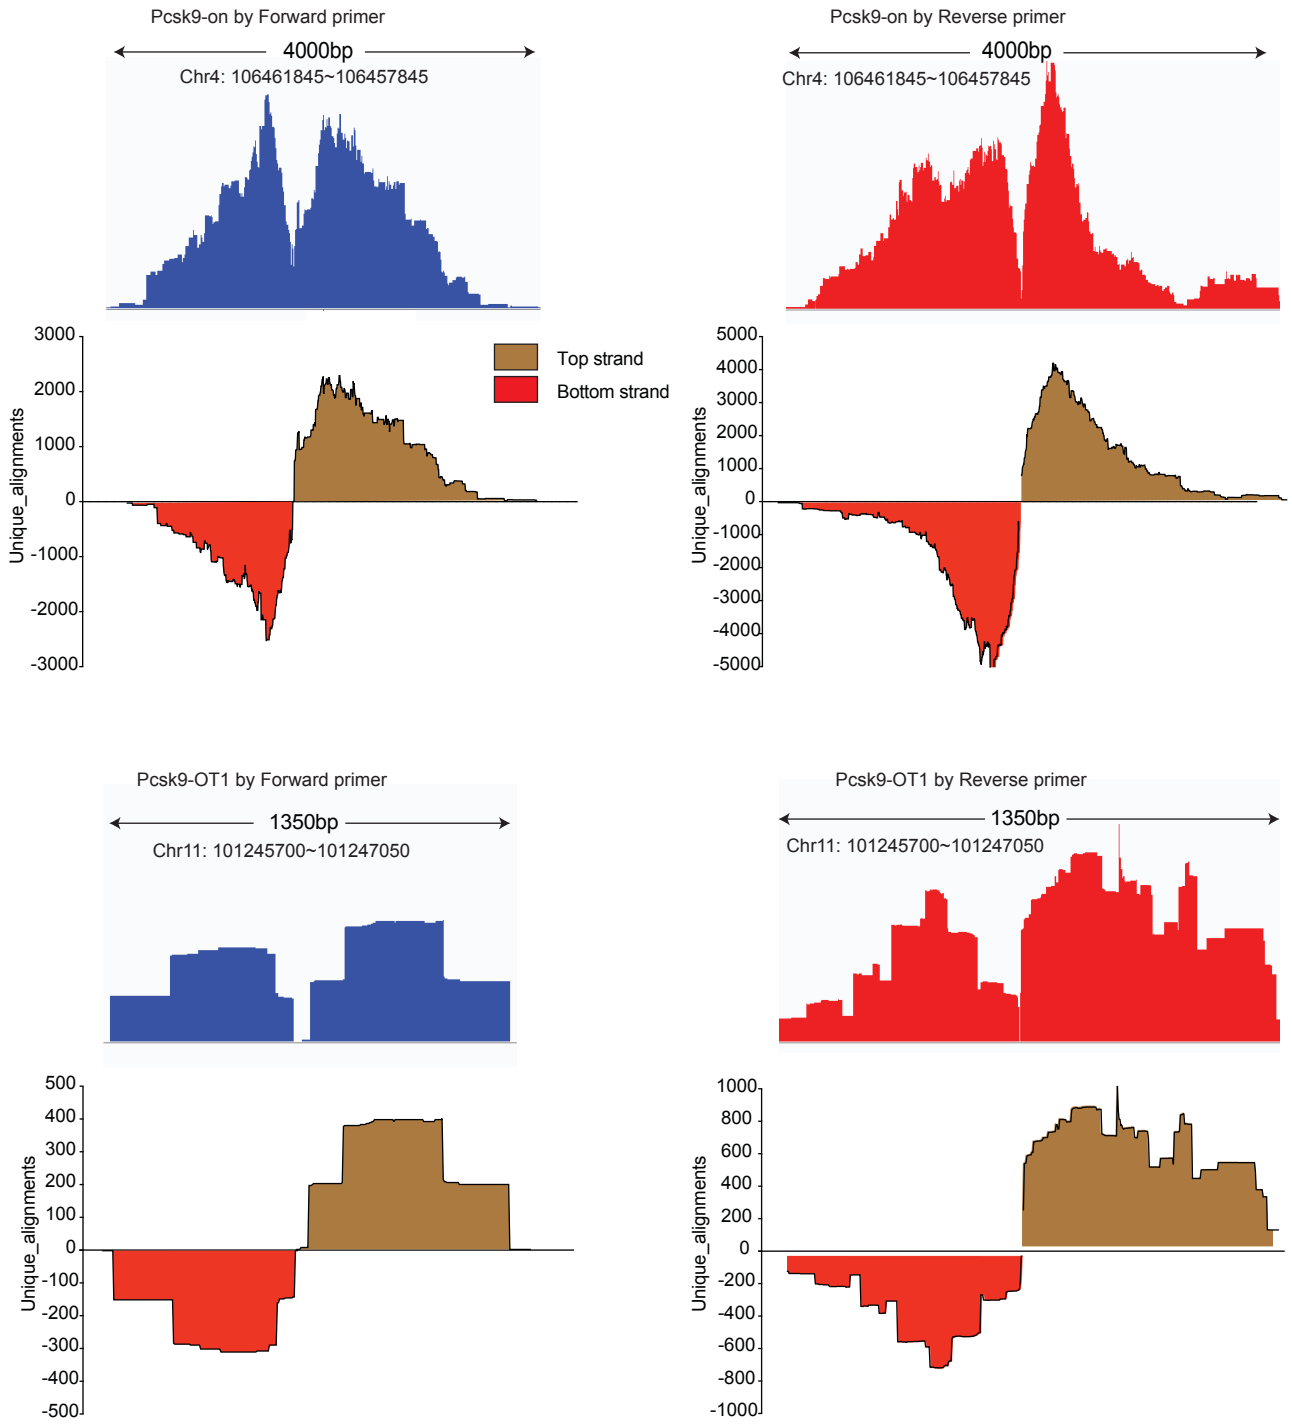

**Supplementary Figure 8. Reads for GUIDE-tag at the Pcsk9 on target-site and off-target site by both primers.**

a, Example of read coverage for GUIDE-tag forward (insert primer F) and reverse primers (insert primer R) at the Pcsk9 on-target site (Pcsk9-on) and off-target site 1 (OT1). Top trace in each plot is raw reads mapped to locus. Bottom trace is strand-specific reads.

**a**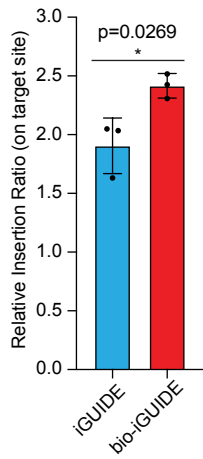**b**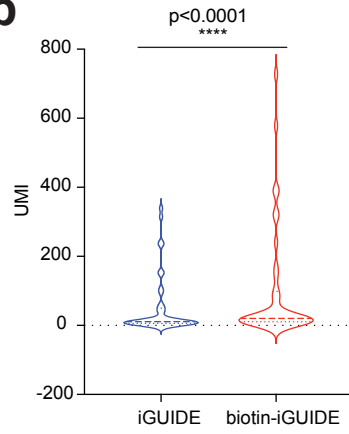**c**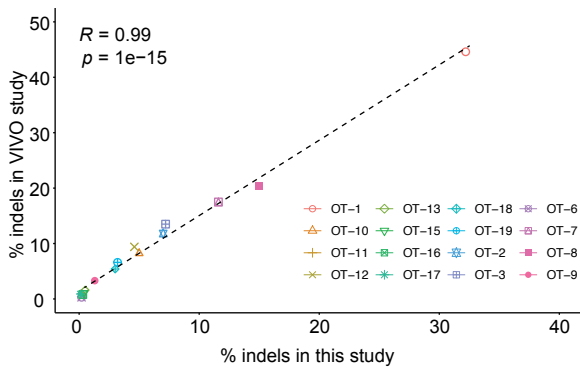**d**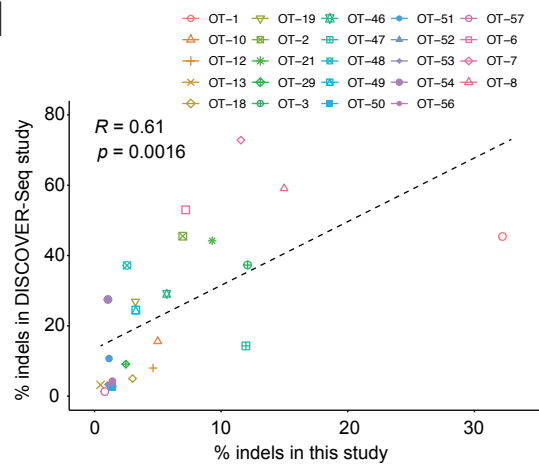**e**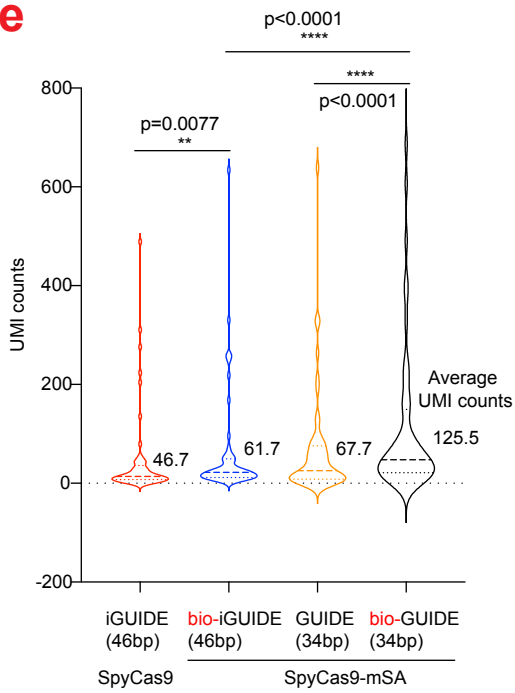

**Supplementary Figure 9. *in vivo* off-target analysis of SpyCas9-mSA with sgPcsk9.**

**a,** Comparison of relative insertion efficiency of the iGUIDE oligo with or without biotin at *Pcsk9* locus by UDiTaS. Relative insertion ratio was normalized to the depth of sequence for each primer and sample. Data are presented as the average of three mice. \*  $P < 0.05$  by unpaired, two-tailed Student's t-test. Error bars are SD.

**b,** Comparison of the UMIs for iGUIDE insertions recovered at *Pcsk9* and all off-target sites between iGUIDE donor and biotin-iGUIDE donor. The line indicates the median of the data and the box indicates the interquartile range. \*\*\*\*  $P < 0.0001$  by unpaired, two-tailed Student's t-test.

**c-d,** Scatter plots of indel frequencies of sgPcsk9 off-target sites identified by this study (GUIDE-tag, x axis) and VIVO [WT mice, day 4 post infection] (c) or DISCOVER-seq (d). *Pcsk9* indel frequency was determined by targeted amplicon sequencing (average of three mice). Dashed lines represent the linear regression fit (Pearson correlation calculated). The p-value for Pearson's correlation coefficient was determined by the two-tailed t-distribution table.

**e.** Comparison of the UMIs of different donor/nuclease at *Pcsk9* off-target sites by GUIDE-tag in mouse liver. Data are presented as the average of three mice. Dashed lines are the average UMI of OT sites. The line indicates the median of the data and the box indicates the interquartile range. \*\* $P < 0.01$ , \*\*\*\* $P < 0.0001$  by two-way ANOVA with Tukey's multiple comparisons test.

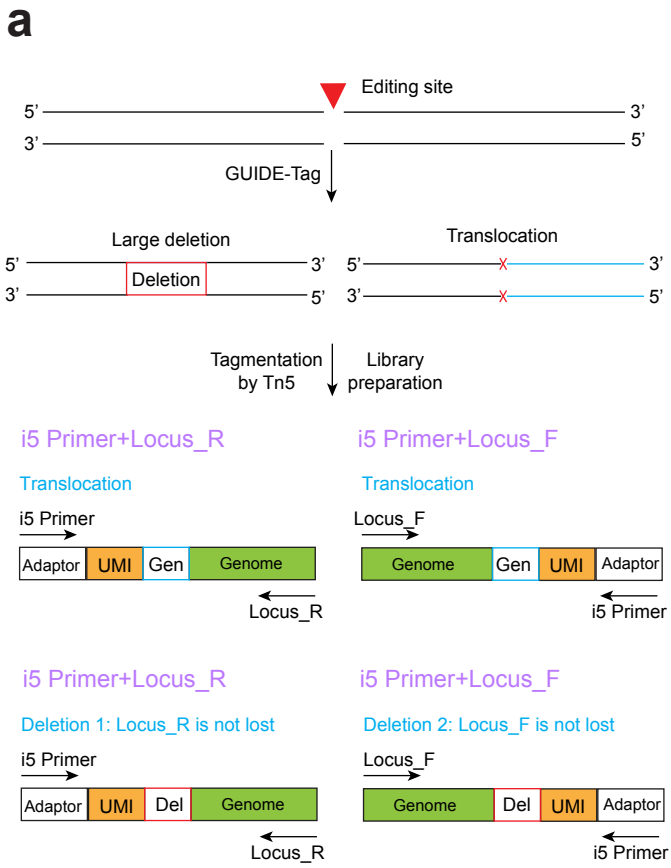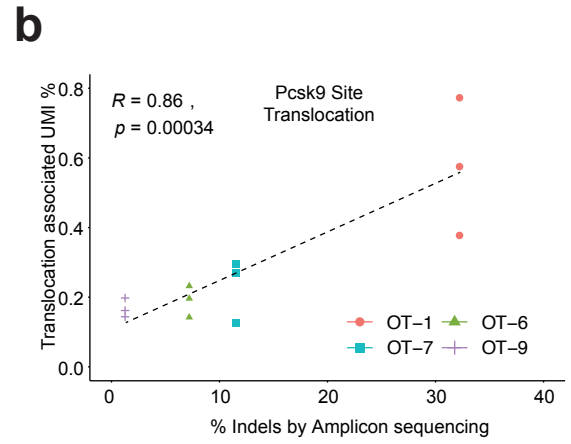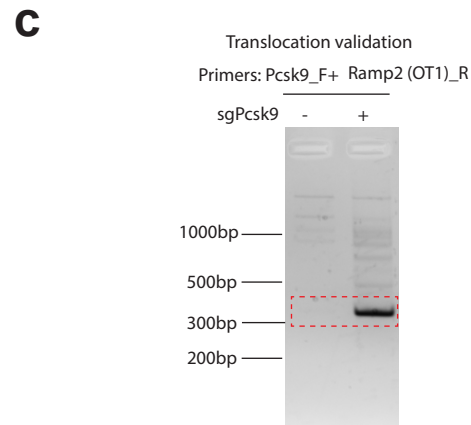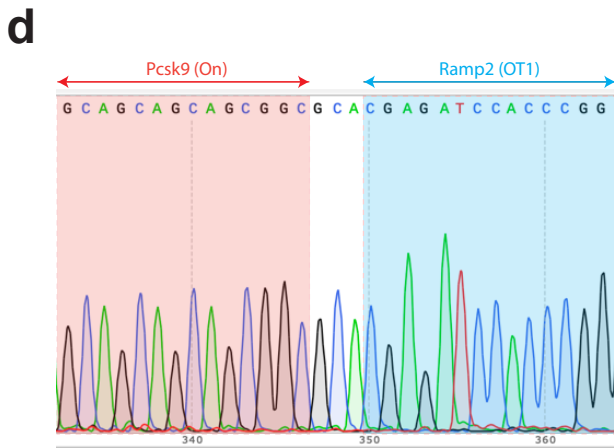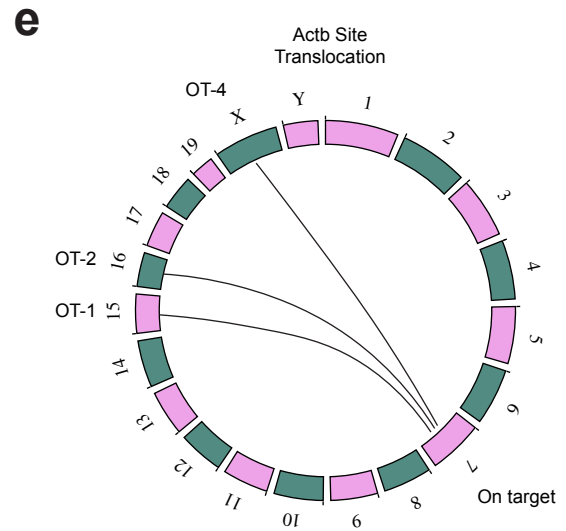

**Supplementary Figure 10. Detection of translocations and large deletions by UDiTaS.**

**a**, overview of deep sequencing library preparation for detection of translocations and large deletions by UDiTaS. Gen, - alternate genomic locus from translocation fusion.

**b**, Scatter plots of UMI% for each statistically significant translocation observed by UDiTaS and indel frequency (average of three mice; indel% by amplicon sequencing at sgPcsk9 OT sites associated with each translocation). Dashed lines represent the linear regression fit (Pearson correlation calculated). The p-value for Pearson's correlation coefficient was determined by the two-tailed t-distribution table.

**c-d**, Translocation between Pcsk9 and Ramp2 (OT-1) was validated by junction primer PCR (c) and sanger sequencing (d).

**e**, Circos plot of statistically significant translocations identified by UDiTaS for SpyCas9-mSA\* and sgActb in mouse liver. Identified translocations are indicated as arcs between two chromosomes.

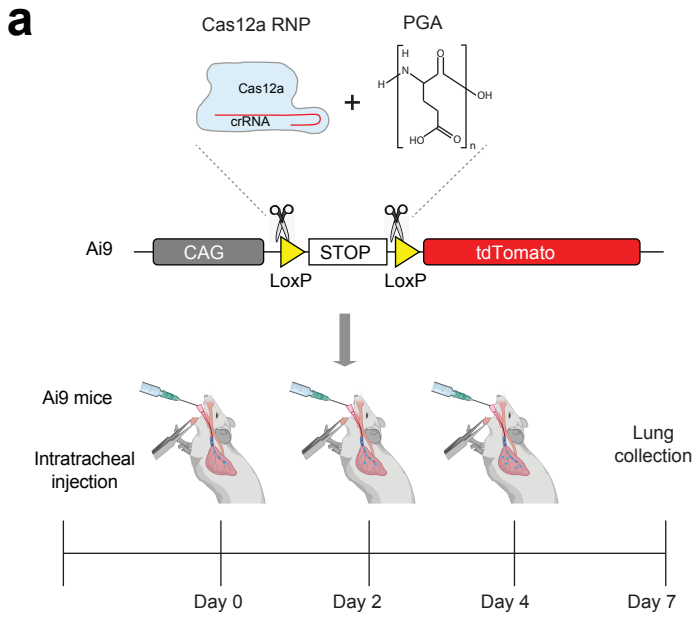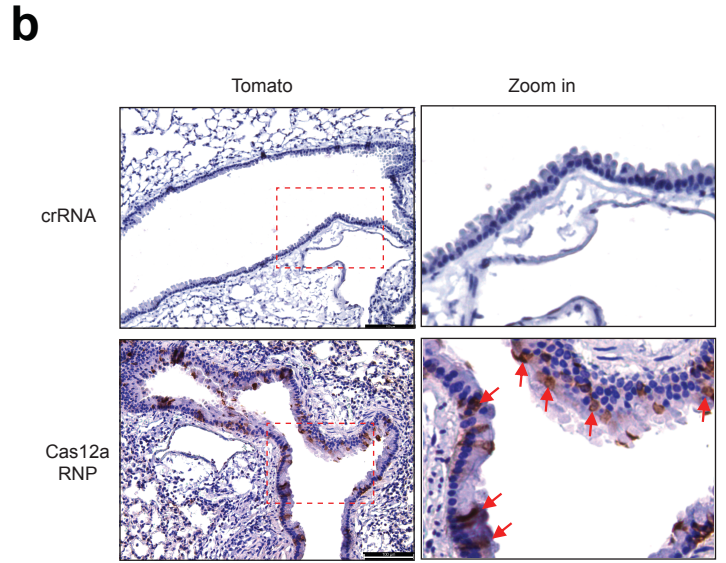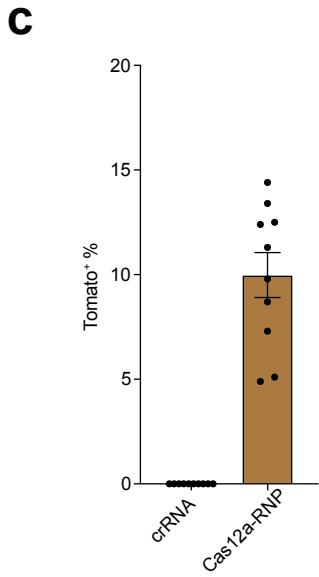



**Supplementary Figure 11. Genome editing in mouse lung by intratracheal delivery of Cas12a RNP.**

**a**, Deliver PGA with enAsCas12a protein and LoxP crRNA intratracheally in LSL-Tomato reporter mice. **b**, Representative Tomato IHC staining (n=3 mice). crRNA only serves as a negative control. Arrows denote Tomato<sup>+</sup> cells. **c**, Quantification of Tomato<sup>+</sup> cells in large airways. Each dot is the ratio of Tomato<sup>+</sup> / total cells in an airway. Results are mean  $\pm$  SEM (n=10 airways in 3 mice).

**a**

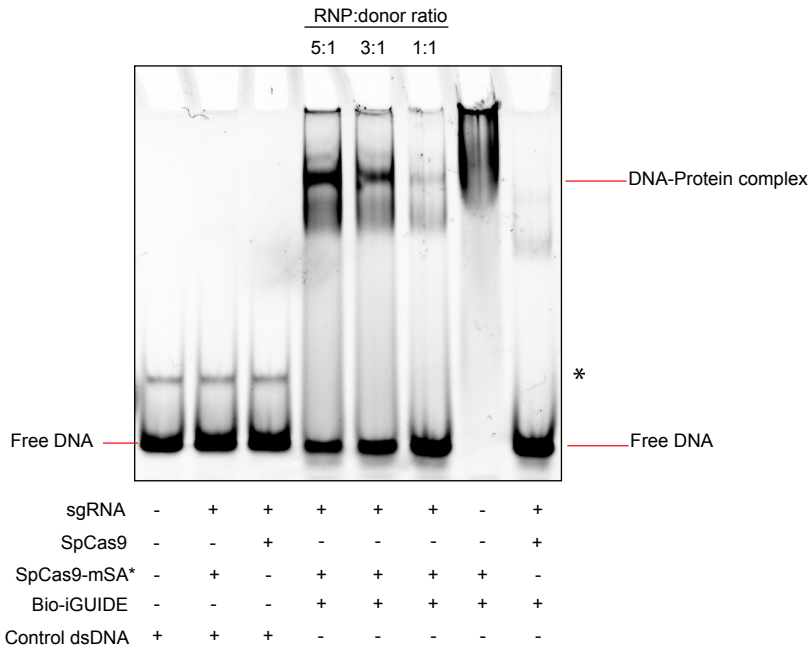

**b**

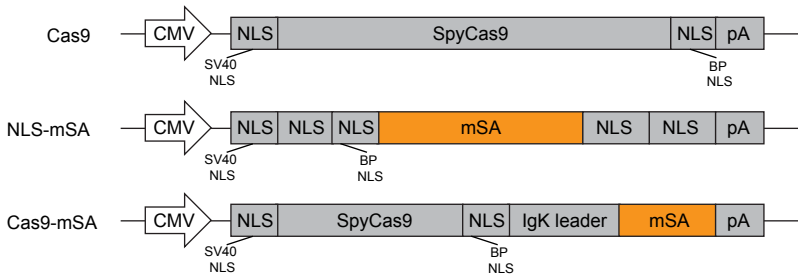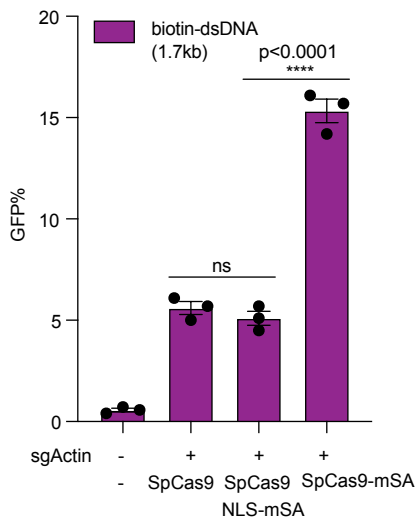

**C**

biotin-iGUIDE only

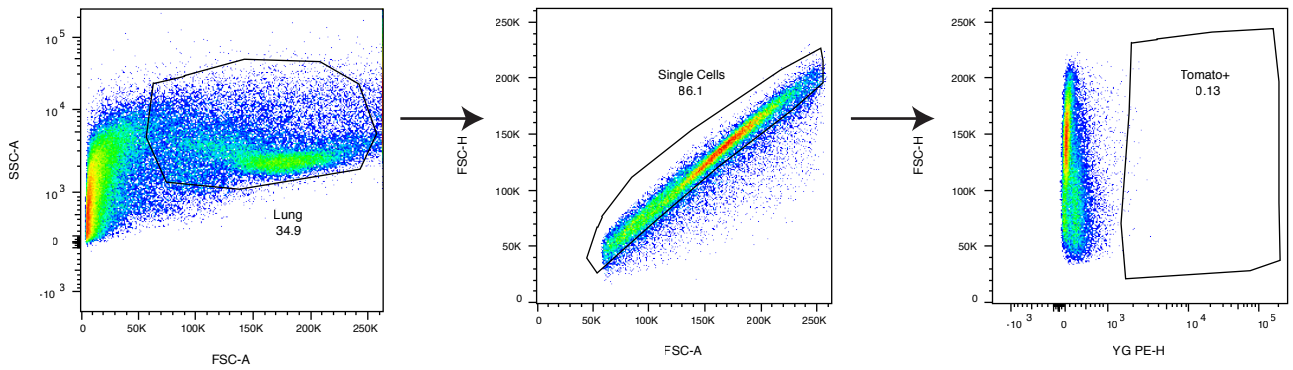

SpyCas9-mSA\* + sgPcsk9 + sgAi9 + biotin-iGUIDE

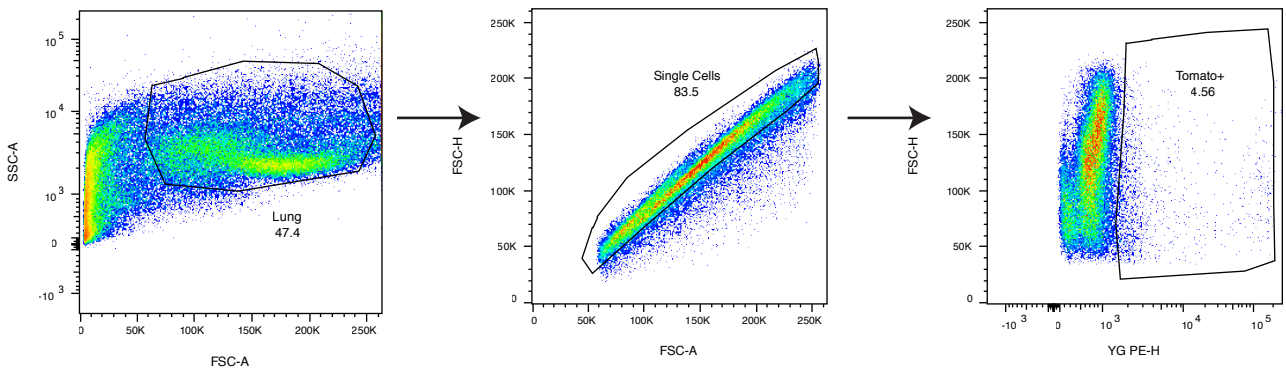

**Supplementary Figure 12. Cas9-mSA\* binds to biotin-dsDNA.**

**a,** Electrophoretic mobility shift assays (EMSA) analysis of SpyCas9-mSA\* protein binding to biotin-dsDNA donor. 10 pmol SpyCas9-mSA\* (or SpyCas9 lacking mSA) and sgRNA were mixed at an equal molar ratio and incubated at room temperature for 10mins, then the Cas9-mSA\* RNP was incubated with biotin-iGUIDE-Cy3 donor or a control Cy3-labeled DNA lacking biotin at a 5:1 molar ratio unless otherwise indicated in a total volume of 30µL EMSA buffer. Samples were analyzed by native PAGE to visualize Cy3 fluorescence. Cas9-mSA\*+donor without sgRNA (lane 7) did not migrate efficiently into the gel. \* denotes non-specific bands.

**b,** N2A cells were transfected with biotin-IRES-GFP donor with various nucleases (SpyCas9/sgRNA, SpyCas9/NLS-mSA/sgRNA or SpyCas9-mSA/sgRNA expression vector). Flow cytometry analysis was performed 4 days after transfection. Biotin-dsDNA with SpyCas9-mSA fusion protein increases %GFP+ cells compared to the unfused SpyCas9 & NLS-mSA constructs. Results were obtained from three independent experiments and presented as mean ± SD. \*\*\*\* $P < 0.0001$  by one-way ANOVA with Tukey's multiple comparisons test. ns, not significant.

**c,** Ai9 reporter mice were dosed with SpyCas9-mSA\*+sgPcsk9 RNP, SpyCas9-mSA\*+ Ai9 sgRNA RNP and bio-iGUIDE donor intratracheally three times over a four day span. 7days later, lungs were dissected into single cells and Tomato positive cells were collected by FACS.

**a**

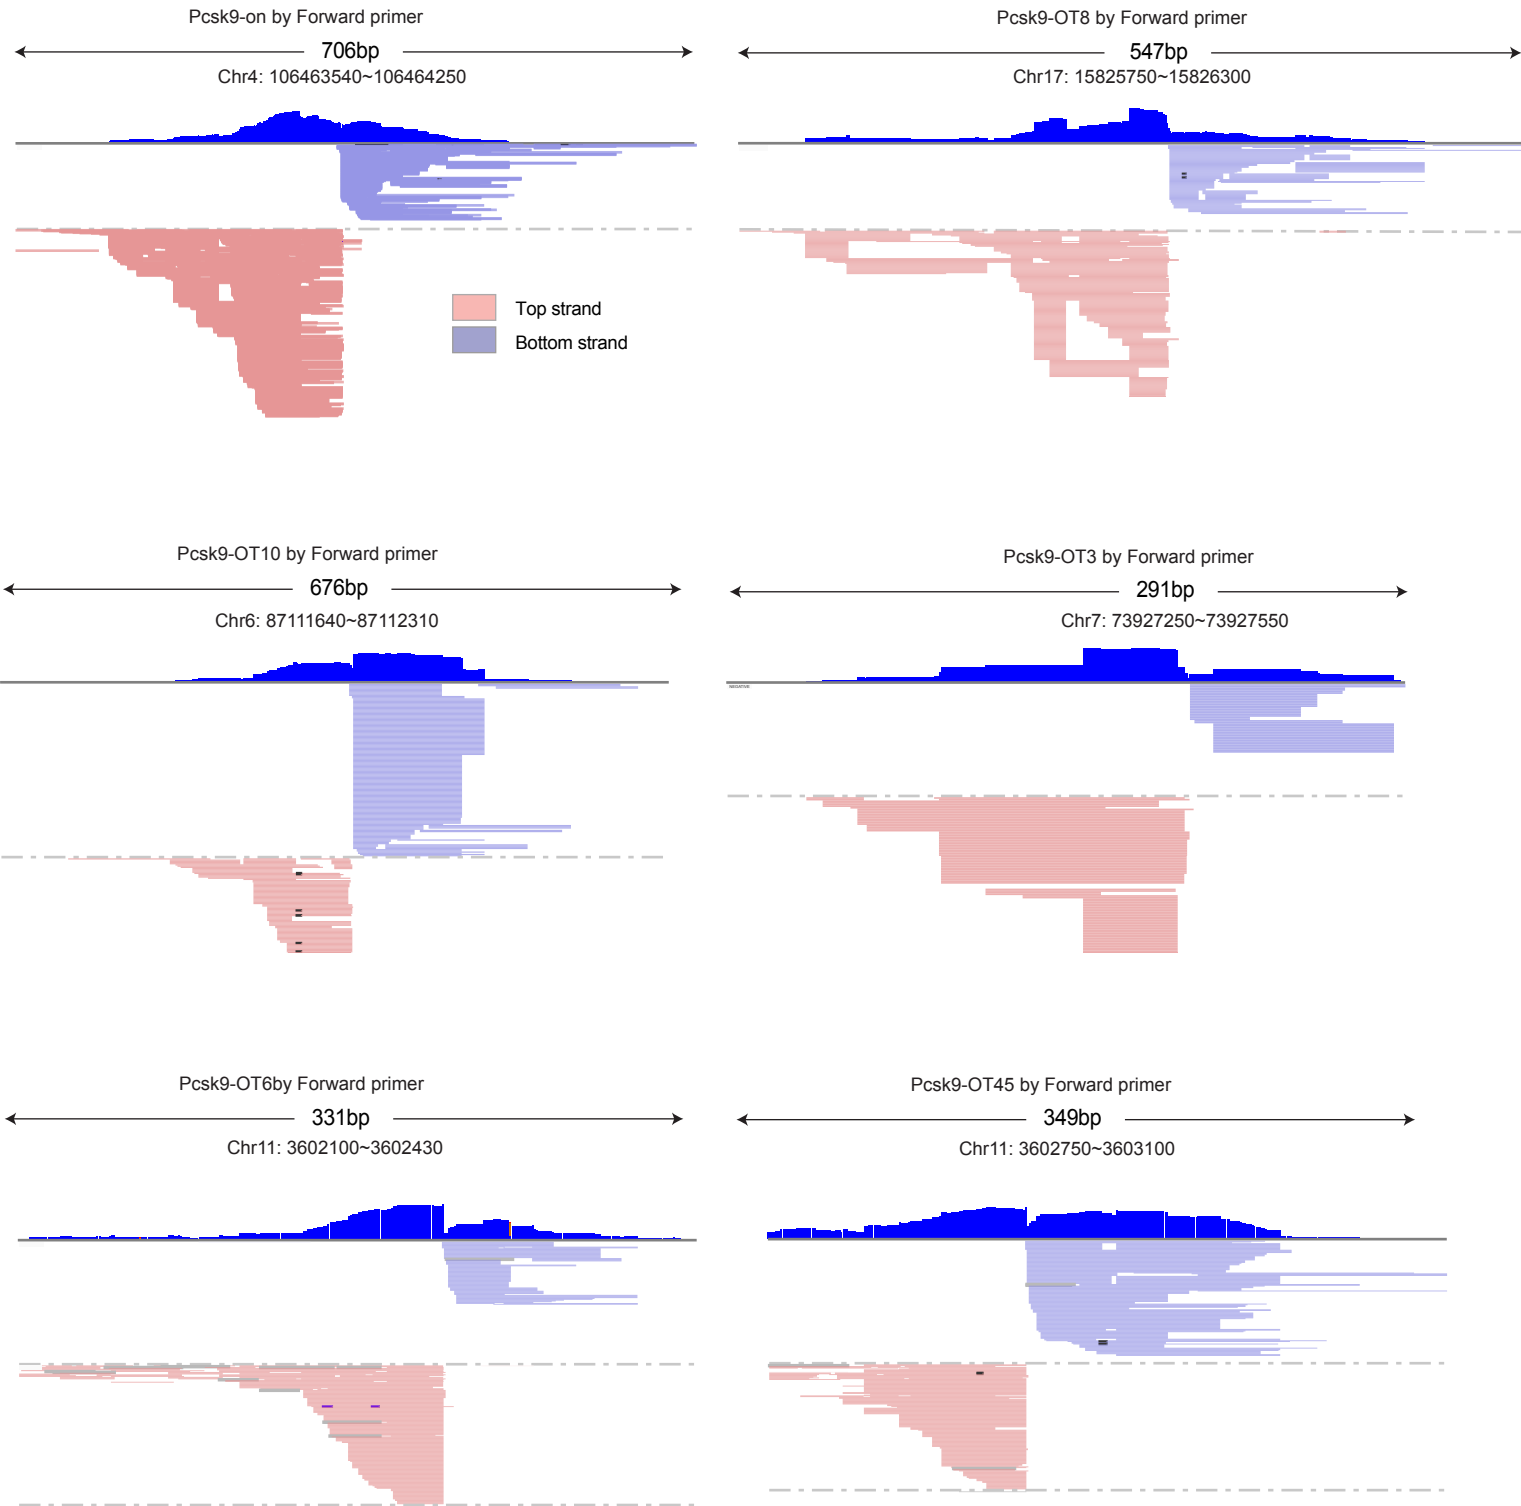

**Supplementary Figure 13. GUIDE-tag reads from the lung for sg*Pcsk9*.** Example of read coverage for GUIDE-tag forward primer (insert primer F) at the *Pcsk9* on-target site (*Pcsk9*-on) and off-target sites. Top trace in each plot is raw reads mapped to the locus. Bottom trace is strand-specific reads.

**a**

Pcsk9 (On)

|                                                                         |     |       |
|-------------------------------------------------------------------------|-----|-------|
| GGGGCACAGTAGCAGCAACAGCAGCAGCAGCGGGCGGCAACAGCGGCAACAGCGGGCCACCGCAGCCACGC | WT  |       |
| GGGGCACAGTAGCAGCAACAGCAGCAGCAGCGGGCGGCAACAGCGGCAACAGCGGGCCACCGCAGCCACGC | +1  | 4.81% |
| GGGGCACAGTAGCAGCAACAGCAGCAGCAGCGGGCGGCAACAGCGGCAACAGCGGGCCACCGCAGCCACGC | -1  | 4.16% |
| GGGGCACAGTAGCAGCAACAGCAGCAGCAGCGGGCGGCAACAGCGGCAACAGCGGGCCACCGCAGCCACGC | -3  | 3.71% |
| GGGGCACAGTAGCAGCAACAGCAGCAGCAGCGGGCGGCAACAGCGGCAACAGCGGGCCACCGCAGCCACGC | -3  | 3.23% |
| GGGGCACAGTAGCAGCAACAGCAGCAGCAGCGGGCGGCAACAGCGGCAACAGCGGGCCACCGCAGCCACGC | -21 | 1.64% |
| GGGGCACAGTAGCAGCAACAGCAGCAGCAGCGGGCGGCAACAGCGGCAACAGCGGGCCACCGCAGCCACGC | -2  | 1.53% |
| GGGGCACAGTAGCAGCAACAGCAGCAGCAGCGGGCGGCAACAGCGGCAACAGCGGGCCACCGCAGCCACGC | +1  | 1.43% |
| GGGGCACAGTAGCAGCAACAGCAGCAGCAGCGGGCGGCAACAGCGGCAACAGCGGGCCACCGCAGCCACGC | -30 | 0.67% |
| GGGGCACAGTAGCAGCAACAGCAGCAGCAGCGGGCGGCAACAGCGGCAACAGCGGGCCACCGCAGCCACGC | -12 | 0.75% |
| GGGGCACAGTAGCAGCAACAGCAGCAGCAGCGGGCGGCAACAGCGGCAACAGCGGGCCACCGCAGCCACGC | -18 | 0.36% |
| GGGGCACAGTAGCAGCAACAGCAGCAGCAGCGGGCGGCAACAGCGGCAACAGCGGGCCACCGCAGCCACGC | +1  | 0.29% |

**b**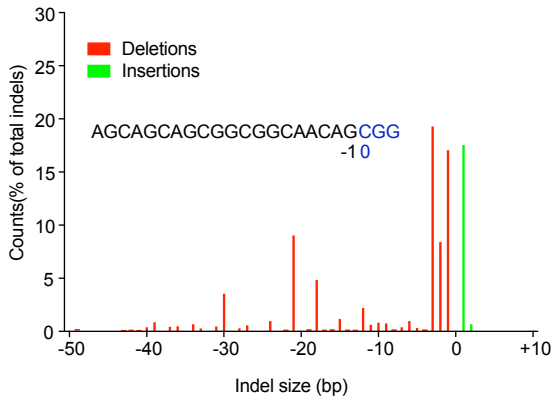**c**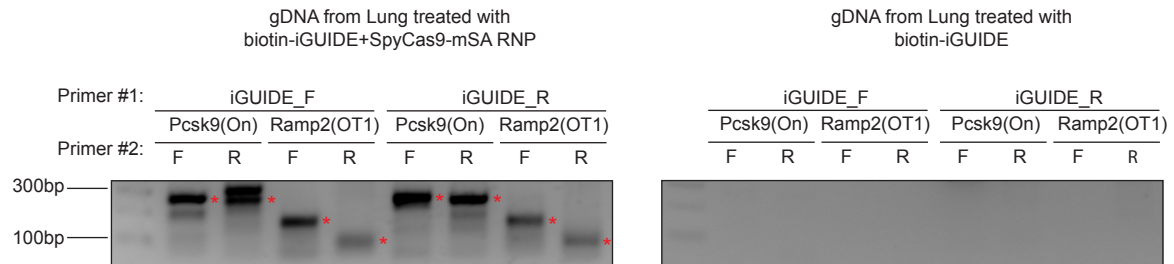**d**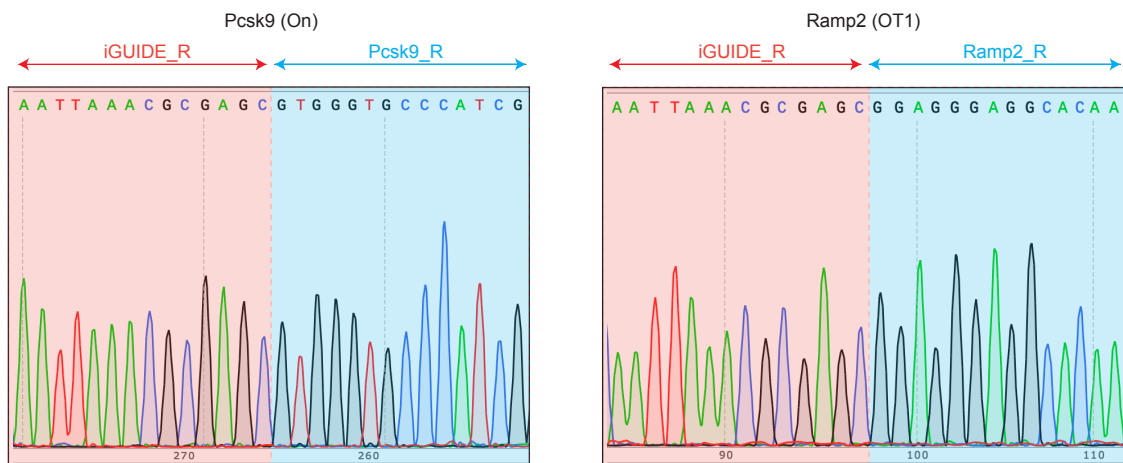

**Supplementary Figure 14. *in vivo* off-target analysis of sgPcsk9 in mouse lung.**

**a**, The percentage of most common sequences at Pcsk9 site in sorted lung cells determined by amplicon sequencing (representative lung of n=2). sgPcsk9 target site is in yellow. PAM sequences are in red. Deleted bases are indicated by dashes.

**b**, Indel sizes induced by SpyCas9-mSA complex at Pcsk9 site in sorted lung cells.

**c**, Validation of biotin-iGUIDE insertion at Pcsk9 site (on) and Ramp2 (OT1) in mouse lung. biotin-iGUIDE only mice serve as a negative control. PCR was performed with indicated primers in to amplify the 5' junction sites and 3' junction site for insertions in different orientations. \* denotes expected PCR bands. Results were obtained from four independent experiments.

**d**, Validation of biotin-iGUIDE insertion at Pcsk9 site (on) and Ramp2 (OT1) in mouse lung by TOPO cloning and Sanger sequencing.



**a**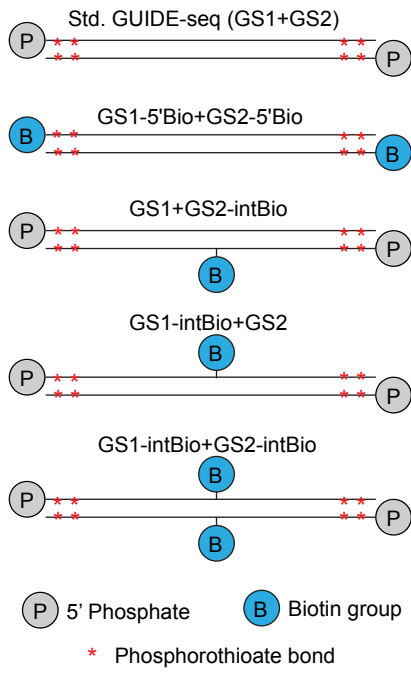**b**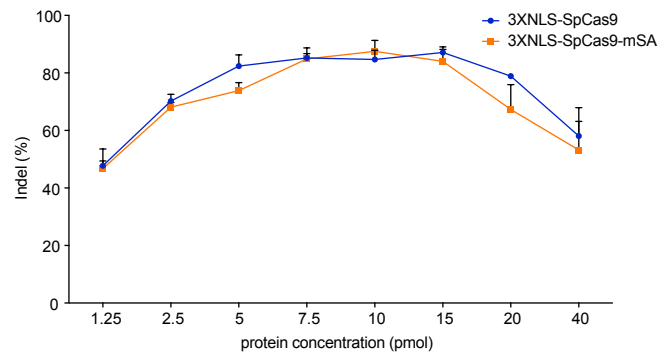**c**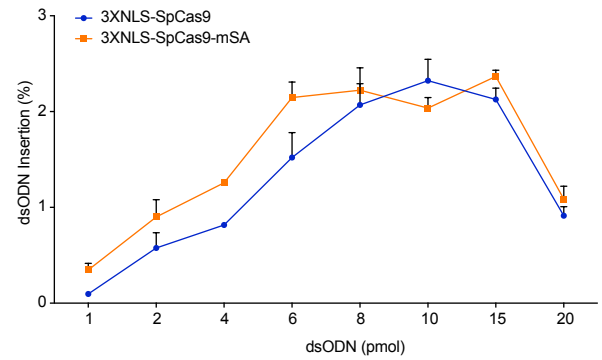**d**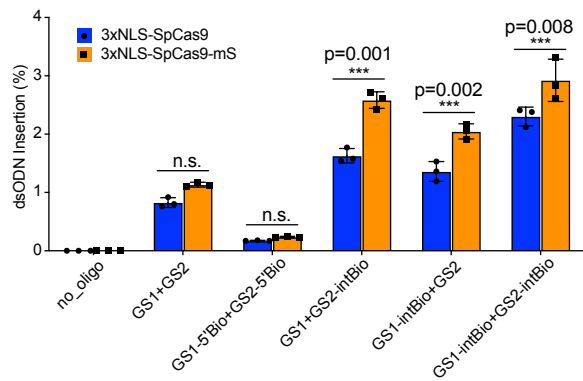**e**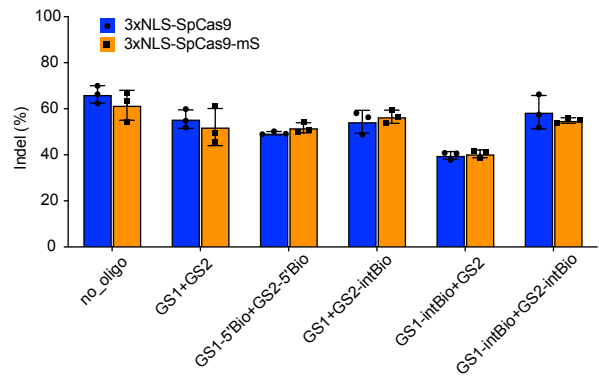**f**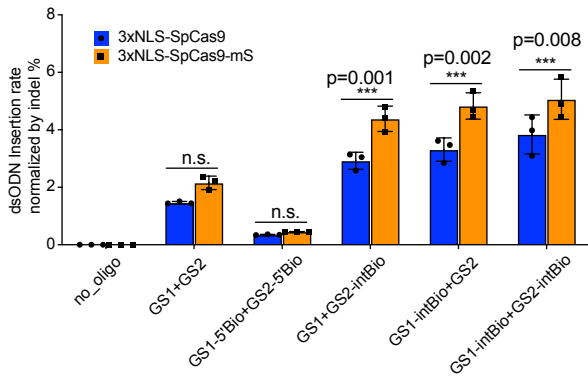

## **Supplementary Figure 15. Optimization of GUIDE-seq donor improves tag insertion efficiency in cell culture**

**a**, Schematic representation of different GUIDE-seq donor duplexes. Duplex oligonucleotides were prepared by annealing two chemically synthesized oligonucleotides with biotin tethered at different positions (5' Biotin [5'Bio] or Internal Biotin [intBio; Biotin dT]) within the GUIDE-seq donor sequence.

**b**, Hepa1-6 cells were electroporated with the indicated concentration of 3xNLS-SpyCas9 sgPcsk9 RNP or 3xNLS-SpyCas9-mSA sgPcsk9 RNP without GUIDE-seq donor. gDNA were isolated 3 days after electroporation from each group and indel percentages were measured by deep sequencing amplicons spanning the Pcsk9 target site. Indel% are presented as mean  $\pm$  s.d. (n=3).

**c**, Hepa1-6 cells were electroporated with 2 pmol of 3xNLS-SpyCas9 sgPcsk9 RNP or 3xNLS-SpyCas9-mSA sgPcsk9 RNP and the indicated dose of GUIDE-seq donor (dsODN) containing a single internal biotin (GS1+GS2-intBio). gDNA were isolated 3 days after electroporation from each group and the insertion percentages were measured by deep sequencing of PCR amplicons spanning the Pcsk9 target site. Insertion% are presented as mean  $\pm$  s.d. (n=3).

**d-e**, Hepa1-6 cells were electroporated with 2 pmol of 3xNLS-SpyCas9 sgPcsk9 RNP or 3xNLS-SpyCas9-mSA sgPcsk9 RNP and 5pmol of each different GUIDE-seq donor. gDNA were isolated 3 days after electroporation from each group and the insertion (**d**) and indel (**e**) percentages were measured by deep sequencing of PCR amplicons spanning the Pcsk9 target site. Insertion% and indel% are presented as mean  $\pm$  s.d. (n=3). n.s., not significant. \*\*\* $P$ <0.001 by two-way ANOVA with Tukey's multiple comparisons test.

**f**, Insertion% from (**d**) was normalized with indel% for each group. Insertion% are presented as mean  $\pm$  s.d. (n=3). n.s., not significant. \*\*\* $P$ <0.001 by two-way ANOVA with Tukey's multiple comparisons test.

Supplementary Figure 1C

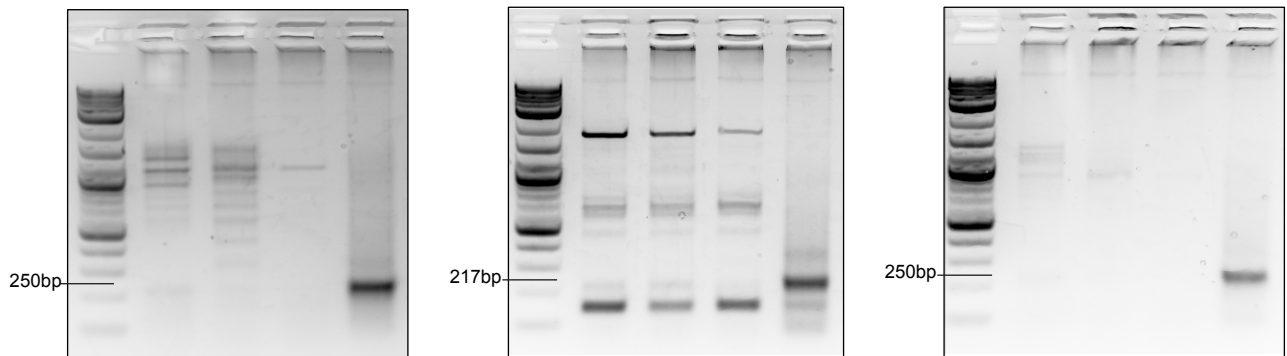

Supplementary Figure 6C

Actin

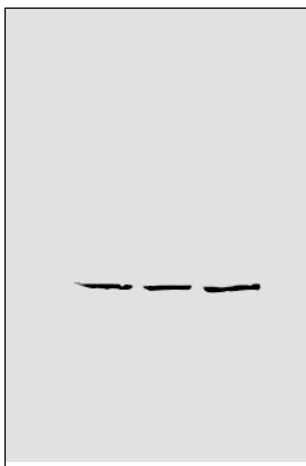

Cas9-mSA

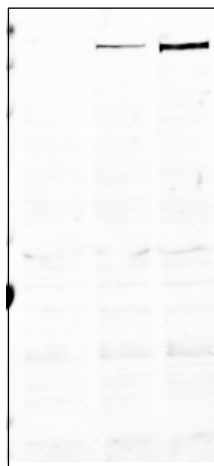

Supplementary Figure 14

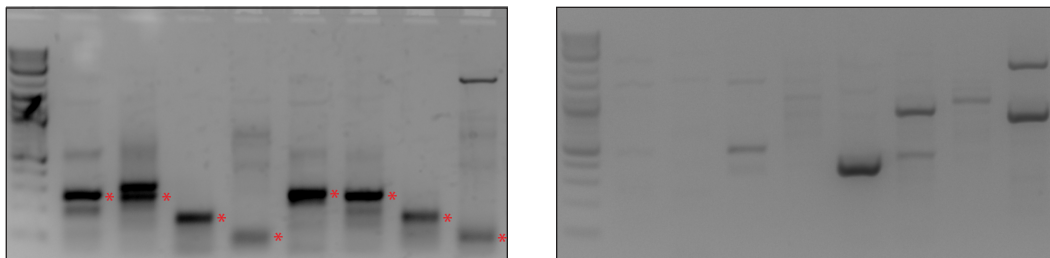

**Supplementary Figure 16. Uncropped gel images.**

**Supplementary Table 1.** Sequences of sgRNAs used in this study. All sequences are shown in 5' to 3' orientation.

| Target sites   | sequence (5'-3')        | Cas9       |          |
|----------------|-------------------------|------------|----------|
| Actin.3'UTR    | CCACCCCCACTCCTAAGAGG    | SpyCas9    | in vivo  |
| Fah intron 1.2 | AATGACTTAATACAATTGCT    | SpyCas9    |          |
| Fah intron 1.3 | GGCCTTGTTACATATAACT     | SpyCas9    | in vivo  |
| Fah intron 1.4 | TACCCATTAATTTCTCCTCCT   | SpyCas9    |          |
| Fah intron 1.5 | CAGTAGGAGGTTCTCCTCTT    | SpyCas9    |          |
| PCSK9          | AGCAGCAGCGGCGGCAACAG    | SpyCas9    | in vivo  |
| GAPDH          | AGCCCCAGCAAGAGCACAAG    | SpyCas9    | In vitro |
| sgRNA-tdTom    | AAGTAAAACCTCTACAAATG    | SpyCas9    | In vivo  |
| Actin.3'UTR    | CAGGAAGTCCCTCACCTCCCAA  | enAsCas12a | In vitro |
| LoxP           | GTATAATGTATGCTATACGAAGT | enAsCas12a | In vivo  |
| Actin.3'UTR    | CGACCATCCTCCTTAGGAGT    | SauCas9    | In vitro |

**Supplementary Table 2.** PCR donors used in this study.

| Figure    | Donor size | Name                 | Primer        |
|-----------|------------|----------------------|---------------|
| Figure 1b | 1.7Kb      | IRES-GFP             | 1640 and 1764 |
|           | 1.7Kb      | biotin-IRES-GFP      | 4035 and 3586 |
| Figure 1c | 1.7Kb      | biotin-IRES-GFP      | 4035 and 3586 |
|           | 2.5Kb      | biotin-IRES-GFP      | 4035 and 4036 |
|           | 3.5Kb      | biotin-IRES-GFP      | 4035 and 4037 |
|           | 4.5Kb      | biotin-IRES-GFP      | 4035 and 4038 |
| Figure 1d | 1.7Kb      | IRES-GFP             | 1640 and 1764 |
|           | 1.7Kb      | biotin-IRES-GFP      | 4035 and 3586 |
| Figure 1e | 1.4Kb      | Fah Exon 2-14        | 3891 and 3892 |
|           | 1.4Kb      | biotin-Fah Exon 2-15 | 3921 and 3921 |
| Figure 3  | 42bp       | iGUIDE               | 4412 and 4413 |
|           | 42bp       | biotin-iGUIDE        | 4404 and 4405 |
| Figure 5a | 1.7Kb      | IRES-GFP             | 1640 and 1764 |
|           | 1.7Kb      | biotin-IRES-GFP      | 4035 and 3586 |
| Figure 5b | 42bp       | biotin-iGUIDE        | 4404 and 4405 |

**Supplementary Table 3.** Sequences of primers used for DNA amplification and high throughput sequencing. All sequences are shown in 5' to 3' orientation.

Primers used for amplification:

| Primer               | Sequence                | Modification |
|----------------------|-------------------------|--------------|
| 1640_IRESdonor1700_F | CGCCAGGGTTTTCCAGTCACGAC | No           |
| 1764_IRESdonor1700_R | AGCGGATAACAATTTACACAGG  | No           |
| 4035_IRESdonor_F     | GCCGCTCTAGAAGTAGTGGAT   | 5'biotin     |
| 3586_IRESdonor1700_R | AGCGGATAACAATTTACACAGG  | 5'biotin     |
| 4036_IRESdonor2500_R | CCAGTGGCGATAAGTCGTGT    | 5'biotin     |
| 4037_IRESdonor3500_R | ACGGATGGCATGACAGTAAGA   | 5'biotin     |
| 4038_IRESdonor4500_R | AAGAGGCCCGCACCGAT       | 5'biotin     |

|                        |                                                        |                   |
|------------------------|--------------------------------------------------------|-------------------|
| 3835 Actin 5junction_F | AATAGTCATTCCAAGTATCC                                   | No                |
| 4151 Actin 3junction_F | GCGGTGGGCTCTATGGATAA                                   | No                |
| 3837 Actin 5junction_R | GAGGAGCACGCGTCAATTGC                                   | No                |
| 3838 Actin 3junction_R | CACAGAAGCAATGCTGTCAC                                   | No                |
| 3865_pho_F             | CGCCAGGGTTTTCCAGTCACGAC                                | 5'phosphorylation |
| 3866_pho_R             | AGCGGATAACAATTTACACAGG                                 | 5'phosphorylation |
| 3891 Fah_F             | GGTTGTCTCAAAGGAAACCATGA                                | No                |
| 3892 Fah_R             | CTCCCCCTGAACCTGAAACAT                                  | No                |
| 3920 bio_Fah_F         | GGTTGTCTCAAAGGAAACCATGA                                | 5'biotin          |
| 3921 bio_Fah_R         | CTCCCCCTGAACCTGAAACAT                                  | 5'biotin          |
| 3986 FAH_1F            | TATCCAGTGGCCGAGGACT                                    | No                |
| 3987 FAH_6R            | ACCACAATGGAGGAAGCTCG                                   | No                |
| 3859 Fah intron PCR F  | CTAGGTACATTTTCTGGAC                                    | No                |
| 3860 Fah intron PCR R  | CTGCTTCAAAGATCAGAAAGG                                  | No                |
| 3849 Fah 5'junction F  | TACCCATTAATTTCTCCCT                                    | No                |
| 4153 Fah 5'junction R  | GATGTTTGGAAAGGGCAGGT                                   | No                |
| OT1-5p                 | TGGTAGAACACCTGCCTGGAATC                                | No                |
| OT2-5p                 | AGTAGCAAGATGGGTGTGACTGGAG                              | No                |
| OT3-5p                 | TGCCCTACAAACTTGCCTACTATCC                              | No                |
| OT5-5p                 | CATTCATCTTGGACAACTCTGGCTT                              | No                |
| OT7-5p                 | GGAGGGAGAAAAAGAAGAAGCACA                               | No                |
| OT4-5p                 | AAAGGCTCTGGGAAATGCCACTC                                | No                |
| OT6-5p                 | CAACAGTTTTGTATCAGAGTAAGCCCAT                           | No                |
| OT8-5p                 | GTGGAGCCTTCGTGATGTTGTCT                                | No                |
| OT9-5p                 | CCCAGTTATTAGTGTGAGAAGCAAGGT                            | No                |
| OT10-5p                | CTACCTTTATGCTTTTGCGGGG                                 | No                |
| 4404 iGUIDE_F          | bio/G*C*TCGCGTTAATTGAGTTGTCATATGTTAATAACGGTATACGC*G*A  | 5'biotin          |
| 4405 iGUIDE_R          | bio/T*C*GCGTATACCGTTATTAACATATGACAACCTCAATTAACGCGA*G*C | 5'biotin          |
| 4412 iGUIDE_F          | G*C*TCGCGTTAATTGAGTTGTCATATGTTAATAACGGTATACGC*G*A      | phosphorylation   |
| 4413 iGUIDE_R          | T*C*GCGTATACCGTTATTAACATATGACAACCTCAATTAACGCGA*G*C     | phosphorylation   |
| 4426 GUIDE_F           | bio/G*T*TTAATTGAGTTGTCATATGTTAATAACGGT*A*T             | 5'biotin          |
| 4427 GUIDE_R           | bio/A*T*ACCGTTATTAACATATGACAACCTCAATTA*A*C             | 5'biotin          |
| 4428 GUIDE_F           | G*T*TTAATTGAGTTGTCATATGTTAATAACGGT*A*T                 | phosphorylation   |
| 4429 GUIDE_R           | A*T*ACCGTTATTAACATATGACAACCTCAATTA*A*C                 | phosphorylation   |

\*=phosphorothioate; bio/ = biotin

#### Primers used for high throughput sequencing

|                |                                                                    |
|----------------|--------------------------------------------------------------------|
| Fah_Locus_F    | GTGACTGGAGTTCAGACGTGTGCTCTTCCGATCTAGCTGGGTAAGACTACCCATTAATTTCTCCCT |
| Fah_Locus_R    | GTGACTGGAGTTCAGACGTGTGCTCTTCCGATCTCAGGAAAGACCCAGAGGCAATC           |
| Fah_Insert_R   | GTGACTGGAGTTCAGACGTGTGCTCTTCCGATCTGAAGACATGTTGATGTTTGGAAAGGGCAGGT  |
| Fah_Insert_F   | GTGACTGGAGTTCAGACGTGTGCTCTTCCGATCTCATTCAATTTATGTTTCAGGTTTCAGGG     |
| i5 Primer      | AATGATACGGCGACCACCGAGATCTACAC                                      |
| 4291_Fah_OT1_F | CTACACGACGCTCTTCCGATCTTGGTAGAACACCTGCCTGGAATC                      |
| 4292_Fah_OT1_R | AGACGTGTGCTCTTCCGATCTCACAACCAAAGGCTCAGGCTAC                        |
| 4293_Fah_OT2_F | CTACACGACGCTCTTCCGATCTAGTAGCAAGATGGGTGTGACTGGAG                    |
| 4294_Fah_OT2_R | AGACGTGTGCTCTTCCGATCTTCCGCTGCCACACACTTGCTTC                        |

|                    |                                                                  |
|--------------------|------------------------------------------------------------------|
| 4295_Fah_OT3_F     | CTACACGACGCTCTCCGATCTTGCCCTACAAACTTGCCACTATCC                    |
| 4296_Fah_OT3_R     | AGACGTGTGCTCTCCGATCTCTTCTTGTCTTGTCCATTGCCTTT                     |
| 4297_Fah_OT4_F     | CTACACGACGCTCTCCGATCTAACTCTGGCTTGTGTCAAGTTAA                     |
| 4298_Fah_OT4_R     | AGACGTGTGCTCTTCCGATCTCTGTTTCAGAATATAGGGAGCC                      |
| 4299_Fah_OT5_F     | CTACACGACGCTCTCCGATCTTCTGGGAAATGCCACTCGCTTG                      |
| 4300_Fah_OT5_R     | AGACGTGTGCTCTTCCGATCTTGCCAGGTCTCATTCTTCTCC                       |
| 4301_Fah_OT6_F     | CTACACGACGCTCTCCGATCTGAAGTAAAAAGGGGGAGGGAGAA                     |
| 4302_Fah_OT6_R     | AGACGTGTGCTCTTCCGATCTAACACATTGGAATTGGACAAAACA                    |
| 4307_Fah_OT7_F     | CTACACGACGCTCTCCGATCTATTTTTATTGACCCAGTTATTAGTGTGA                |
| 4308_Fah_OT7_R     | AGACGTGTGCTCTTCCGATCTAATGAATATAACCAACAAAATGAGTACAC               |
| 4309_Fah_OT8_F     | CTACACGACGCTCTCCGATCTCCAGGTAGGAATAAGTCAGCCGA                     |
| 4310_Fah_OT8_R     | AGACGTGTGCTCTTCCGATCTTAGAGTTGTAAAACGGAAACCCTTG                   |
| 4311_Fah_OT9_F     | CTACACGACGCTCTCCGATCTTGAAGGGGACTGGGGAGATG                        |
| 4312_Fah_OT9_R     | AGACGTGTGCTCTTCCGATCTATTTTTGTCTCCCTTGCTTTAGTATTA                 |
| 4530_Actb_Locus_F  | GTGACTGGAGTTCAGACGTGTGCTCTTCCGATCTATCCATGAAATAAGTGGTTACAGGAAGTC  |
| 4531_Actb_insert_R | GTGACTGGAGTTCAGACGTGTGCTCTTCCGATCTGGAGAGGAGCACGCGTCAATTGC        |
| 4532_Actb_insert_F | GTGACTGGAGTTCAGACGTGTGCTCTTCCGATCTGGGGATGCGGTGGGCTCTATGGATAA     |
| 4533_Actb_Locus_R  | GTGACTGGAGTTCAGACGTGTGCTCTTCCGATCTTTACACAGAAGCAATGCTGTCACTTCCC   |
| 4534_Pcsk9_Locus_F | GTGACTGGAGTTCAGACGTGTGCTCTTCCGATCTGGACGGGAGGGCGAGCATCAG          |
| 4535_Pcsk9_Locus_R | GTGACTGGAGTTCAGACGTGTGCTCTTCCGATCTAGGCGTCCATGTCTTCCCGA           |
| iGUIDE_insert_F    | GTGACTGGAGTTCAGACGTGTGCTCTTCCGATCTTTAATTGAGTTGTCATATGTTAATAACGGT |
| iGUIDE_insert_R    | GTGACTGGAGTTCAGACGTGTGCTCTTCCGATCTCCGTTATTAACATATGACAACCTCAATTAA |
| 4547_Pcsk9_On_F    | CTACACGACGCTCTCCGATCTTCATCAGCCAGGCCATCCTCCT                      |
| 4573_Pcsk9_On_R    | AGACGTGTGCTCTTCCGATCTGTCCCAGGCGTCCATGTCTTCC                      |
| 4546_Pcsk9_OT1_F   | CTACACGACGCTCTCCGATCTGGATCTCGGCTTGGTGTGACCC                      |
| 4572_Pcsk9_OT1_R   | AGACGTGTGCTCTTCCGATCTGCTCCGCACGTGATTGGTACT                       |
| 4551_Pcsk9_OT2_F   | CTACACGACGCTCTCCGATCTACAACAAAACCCACCGCAGCG                       |
| 4577_Pcsk9_OT2_R   | AGACGTGTGCTCTTCCGATCTGCGACTCCTCTGCACCTCCTC                       |
| 4706_Pcsk9_OT3_F   | CTACACGACGCTCTCCGATCTGTTAGAAGGGAAAAAGGGTGTAGACT                  |
| 4707_Pcsk9_OT3_R   | AGACGTGTGCTCTTCCGATCTCAGCCACTAACTGTGATTGTCTCC                    |
| 4559_Pcsk9_OT4_F   | CTACACGACGCTCTCCGATCTAGGCTACTCACCTCCCCTGCTG                      |
| 4585_Pcsk9_OT4_R   | AGACGTGTGCTCTTCCGATCTCGTCTGCCTGTGGGTCTGTTCA                      |
| 4565_Pcsk9_OT5_F   | CTACACGACGCTCTCCGATCTCCAGGCCCTCGCATCACTGTAA                      |
| 4591_Pcsk9_OT5_R   | AGACGTGTGCTCTTCCGATCTAGGACACTGGTGGGAGTCTTAGGA                    |
| 4550_Pcsk9_OT6_F   | CTACACGACGCTCTTCCGATCTTCCAACAACCAGCAAACCAGCA                     |
| 4576_Pcsk9_OT6_R   | AGACGTGTGCTCTTCCGATCTGGAGAGGTGTAATTTTTGCCAGCTGC                  |
| 4549_Pcsk9_OT7_F   | CTACACGACGCTCTTCCGATCTCGGTGGCTTCTCCCTTCGCTG                      |
| 4575_Pcsk9_OT7_R   | AGACGTGTGCTCTTCCGATCTTCTCTTCTGTCTCCTCCTCGCCAC                    |
| 4548_Pcsk9_OT8_F   | CTACACGACGCTCTTCCGATCTTTCCGGACCCAGAACAAAGCCC                     |
| 4574_Pcsk9_OT8_R   | AGACGTGTGCTCTTCCGATCTGAGACCTGCATGGACGGGCATG                      |
| 4556_Pcsk9_OT9_F   | CTACACGACGCTCTTCCGATCTCACCCATCACCCGCTCAACTC                      |
| 4582_Pcsk9_OT9_R   | AGACGTGTGCTCTTCCGATCTCCCTTTCCAACCACGTGCAGA                       |
| 4552_Pcsk9_OT10_F  | CTACACGACGCTCTTCCGATCTCCCAGTAACACCACCAGCAGCA                     |
| 4578_Pcsk9_OT10_R  | AGACGTGTGCTCTTCCGATCTCTAGATCTGGGGCCGCTGTTGC                      |
| 4563_Pcsk9_OT11_F  | CTACACGACGCTCTTCCGATCTGAGGAAGGACAGGGTCCGCG                       |
| 4589_Pcsk9_OT11_R  | AGACGTGTGCTCTTCCGATCTCCGCAAAGATGGAGGAGCCGT                       |
| 4553_Pcsk9_OT12_F  | CTACACGACGCTCTTCCGATCTTCATTTCCCTCCCCTCCTGCCT                     |
| 4579_Pcsk9_OT12_R  | AGACGTGTGCTCTTCCGATCTGGCAATTCTTTATTATCAATTGAAGCCAGC              |

|                   |                                                  |
|-------------------|--------------------------------------------------|
| 4558_Pcsk9_OT13_F | CTACACGACGCTCTCCGATCTCATCCGCGGTTTTACCTGTT        |
| 4584_Pcsk9_OT13_R | AGACGTGTGCTCTTCCGATCTGAGCCGACACTTCAGACCCCT       |
| 4564_Pcsk9_OT14_F | CTACACGACGCTCTCCGATCTGCACTTGCACTGTGGGGAAAAGG     |
| 4590_Pcsk9_OT14_R | AGACGTGTGCTCTTCCGATCTTGACTACATTCACTGTGCACCCCA    |
| 4560_Pcsk9_OT15_F | CTACACGACGCTCTCCGATCTGGGACGGTTCAAGTGAAGGGGA      |
| 4586_Pcsk9_OT15_R | AGACGTGTGCTCTTCCGATCTGTCAGACCCCAACCCACCCAAA      |
| 4561_Pcsk9_OT16_F | CTACACGACGCTCTCCGATCTTTGCCTGCCCTGGTTTCTTGCT      |
| 4587_Pcsk9_OT16_R | AGACGTGTGCTCTTCCGATCTGCCAGAGCACTGTGGCTACTC       |
| 4569_Pcsk9_OT17_F | CTACACGACGCTCTCCGATCTGGGCTCCAGAACTTGACCAGC       |
| 4595_Pcsk9_OT17_R | AGACGTGTGCTCTTCCGATCTAGATATTCCTCGCGCGGCATC       |
| 4555_Pcsk9_OT18_F | CTACACGACGCTCTCCGATCTTAAGGCTGTGACCCTGCTGTGC      |
| 4581_Pcsk9_OT18_R | AGACGTGTGCTCTTCCGATCTCTCCTGGTCCAGCAGTTGTCCC      |
| 4554_Pcsk9_OT19_F | CTACACGACGCTCTCCGATCTAGCTGGATCAAGGCATGGAGGC      |
| 4580_Pcsk9_OT19_R | AGACGTGTGCTCTTCCGATCTTGGTGGTTCTAGCTGCTGTGGC      |
| 4562_Pcsk9_OT20_F | CTACACGACGCTCTCCGATCTTGTTAAAGGCTTTGAAACTCACAGG   |
| 4588_Pcsk9_OT20_R | AGACGTGTGCTCTTCCGATCTAGAAAAGTCTCAGTGTCTGTTAGTGGA |
| 4708_Pcsk9_OT21_F | CTACACGACGCTCTCCGATCTGTGGGGACAAAGATGAAATAGAAGC   |
| 4709_Pcsk9_OT21_R | AGACGTGTGCTCTTCCGATCTACCATCTTGTGGTGGTTCTAGCTG    |
| 4571_Pcsk9_OT22_F | CTACACGACGCTCTCCGATCTGGTGTCTTGCTGATGTTCTCTGC     |
| 4597_Pcsk9_OT22_R | AGACGTGTGCTCTTCCGATCTAGCACGAGCAGTAGCAAAAGCA      |
| 4568_Pcsk9_OT24_F | CTACACGACGCTCTCCGATCTGAGAGGTGGGGAAGAGCTGGGA      |
| 4594_Pcsk9_OT24_R | AGACGTGTGCTCTTCCGATCTGTGGCTGAAAAGTGAAGCTGGGGA    |
| 4570_Pcsk9_OT27_F | CTACACGACGCTCTCCGATCTGGACCACCAGTGTGCTTGGACT      |
| 4596_Pcsk9_OT27_R | AGACGTGTGCTCTTCCGATCTTGCAGCAGGTGTTTGATGTGTGC     |
| 4710_Pcsk9_OT29_F | CTACACGACGCTCTCCGATCTGGAGCACAGGAAGTTGGGACT       |
| 4711_Pcsk9_OT29_R | AGACGTGTGCTCTTCCGATCTCAAGATGAGCGACGTGAGCC        |
| 4712_Pcsk9_OT44_F | CTACACGACGCTCTCCGATCTGCAGCAAGTCTAATCTTCAATGTCA   |
| 4713_Pcsk9_OT44_R | AGACGTGTGCTCTTCCGATCTTCTTGAGAGGGTATGAATGGGAG     |
| 4714_Pcsk9_OT46_F | CTACACGACGCTCTCCGATCTTGTCTTAGATATTGCTCTGTTCTTCTG |
| 4715_Pcsk9_OT46_R | AGACGTGTGCTCTTCCGATCTGGGAAACCTCAGTGCCAGTGTC      |
| 4716_Pcsk9_OT47_F | CTACACGACGCTCTTCCGATCTAACACATAAACAAGGTCTGAATCTA  |
| 4717_Pcsk9_OT47_R | AGACGTGTGCTCTTCCGATCTCATCTTGTGGTGGTTCTAGTTGC     |
| 4718_Pcsk9_OT48_F | CTACACGACGCTCTTCCGATCTTTGGGGCACACACGGGTCA        |
| 4719_Pcsk9_OT48_R | AGACGTGTGCTCTTCCGATCTCCAGAATGGTCACGGTCAGGG       |
| 4720_Pcsk9_OT49_F | CTACACGACGCTCTTCCGATCTTCAGCCGCTCCTCACCTGG        |
| 4721_Pcsk9_OT49_R | AGACGTGTGCTCTTCCGATCTGAAAAGCCCGTGAAACAAGAGGA     |
| 4722_Pcsk9_OT50_F | CTACACGACGCTCTTCCGATCTTTGGCTCCCTGCCTCCTAATCC     |
| 4723_Pcsk9_OT50_R | AGACGTGTGCTCTTCCGATCTTGGTGGCTGCTTCTGGGAGG        |
| 4724_Pcsk9_OT51_F | CTACACGACGCTCTTCCGATCTTGAGCCAGAACCAGGGAGA        |
| 4725_Pcsk9_OT51_R | AGACGTGTGCTCTTCCGATCTTTGCTCCTTCTTGGCTACTGG       |
| 4726_Pcsk9_OT52_F | CTACACGACGCTCTTCCGATCTCTGCGAACATTGCCTGGG         |
| 4727_Pcsk9_OT52_R | AGACGTGTGCTCTTCCGATCTTGGTGGCCTAGAGAATCACAC       |
| 4728_Pcsk9_OT53_F | CTACACGACGCTCTTCCGATCTCGATAAGACGGCTATAAAATCCC    |
| 4729_Pcsk9_OT53_R | AGACGTGTGCTCTTCCGATCTCTCTGAGAAGTTTCCGCTAAGTTGT   |
| 4730_Pcsk9_OT54_F | CTACACGACGCTCTTCCGATCTTTGTTGAGGGGGACGGAGGAC      |
| 4731_Pcsk9_OT54_R | AGACGTGTGCTCTTCCGATCTAATGAAAGGAAAAGCAGGGTCTGTG   |
| 4732_Pcsk9_OT56_F | CTACACGACGCTCTTCCGATCTGAGTGAGTTCCAGGACAGCCAG     |
| 4733_Pcsk9_OT56_R | AGACGTGTGCTCTTCCGATCTTAAGAGAGGCTGGGGTCAATAATG    |



|                    |                                                      |
|--------------------|------------------------------------------------------|
| 4734_Pcsk9_OT57_F  | CTACACGACGCTCTCCGATCTCGGTAGCAAGTGGTTTGGCAG           |
| 4735_Pcsk9_OT57_R  | AGACGTGTGCTCTTCCGATCTACCTTCTGTGGTAGCTCCAGCT          |
| 4736_Pcsk9_OT59_F  | CTACACGACGCTCTCCGATCTTGTATGAGGAGCCAGTGACATGA         |
| 4737_Pcsk9_OT59_R  | AGACGTGTGCTCTTCCGATCTGGGTGGGAACAAAGGAGGTG            |
| 4738_Pcsk9_OT63_F  | CTACACGACGCTCTCCGATCTAGCCTTTAGGAGCTGTCCTTCAG         |
| 4739_Pcsk9_OT63_R  | AGACGTGTGCTCTTCCGATCTCAGGGGGAAGAAAGTGGATTGTA         |
| 4740_Pcsk9_OT65_F  | CTACACGACGCTCTCCGATCTCACCTCCTAAACTCCTTCCCCTAAC       |
| 4741_Pcsk9_OT65_R  | AGACGTGTGCTCTTCCGATCTAAGCAGGAGTGGGTGGGTTG            |
| 4742_Pcsk9_OT66_F  | CTACACGACGCTCTCCGATCTGGCTGCCCTGCTGGTGTCTG            |
| 4743_Pcsk9_OT66_R  | AGACGTGTGCTCTTCCGATCTGGATGGGTCCAGTTCCTTTAGCAG        |
| 4744_Pcsk9_OT67_F  | CTACACGACGCTCTCCGATCTTGGCTGTCCAGTGGTTTGTG            |
| 4745_Pcsk9_OT67_R  | AGACGTGTGCTCTTCCGATCTCTTTGGCAATCAGTATGCGAGT          |
| 4746_Pcsk9_OT69_F  | CTACACGACGCTCTCCGATCTTTGAGGATCTCCTCCACTGTGCC         |
| 4747_Pcsk9_OT69_R  | AGACGTGTGCTCTTCCGATCTGCGGTCCAGTCTGCCCC               |
| 4748_Pcsk9_OT75_F  | CTACACGACGCTCTCCGATCTATGGTTGACAGCAGTTGGAGATG         |
| 4749_Pcsk9_OT75_R  | AGACGTGTGCTCTTCCGATCTGCTCCTGTTGTGGCTCTGTCTG          |
| 4750_Pcsk9_OT79_F  | CTACACGACGCTCTCCGATCTTTACCAAGATCTCTGTCCACTCTCTT      |
| 4751_Pcsk9_OT79_R  | AGACGTGTGCTCTTCCGATCTCTAGAGTCATATTCTGAGGAAGGGACA     |
| 4752_Pcsk9_OT87_F  | CTACACGACGCTCTCCGATCTCATCTTGGTGGCAGCATTGTG           |
| 4753_Pcsk9_OT87_R  | AGACGTGTGCTCTTCCGATCTGCACAGGCTTATGGAACACAATCA        |
| 4754_Pcsk9_OT96_F  | CTACACGACGCTCTCCGATCTAGGTGTCAAGGGACTCTGTGCTC         |
| 4755_Pcsk9_OT96_R  | AGACGTGTGCTCTTCCGATCTAGGACATAATCTGCTACCTACTGACATC    |
| 4756_Pcsk9_OT104_F | CTACACGACGCTCTCCGATCTCTACCTACATTTTCATCTGATTCTCTG     |
| 4757_Pcsk9_OT104_R | AGACGTGTGCTCTTCCGATCTTTTGATGTGTGTATCTGTCCGGTCTG      |
| 4764_Pcsk9_OT108_F | CTACACGACGCTCTCCGATCTCACCTGTTTTCTGGTATTGGCTTGTC      |
| 4765_Pcsk9_OT108_R | AGACGTGTGCTCTTCCGATCTCCAGACACACAAAACAAGGCTTACAAT     |
| 4766_Pcsk9_OT112_F | CTACACGACGCTCTTCCGATCTACTCTGAAAAAGACAGTTTAGTGGCA     |
| 4767_Pcsk9_OT112_R | AGACGTGTGCTCTTCCGATCTGAAGGAAATCACATTTAAAGAGACAGCT    |
| 4768_Pcsk9_OT120_F | CTACACGACGCTCTTCCGATCTAGAGATGCTGCCTTTCCCCT           |
| 4769_Pcsk9_OT120_R | AGACGTGTGCTCTTCCGATCTTTTCACCACACACTTTTGGACCC         |
| 4758_Pcsk9_OT143_F | CTACACGACGCTCTTCCGATCTAAGGGGAAATGAGTGTAAGGGGAG       |
| 4759_Pcsk9_OT143_R | AGACGTGTGCTCTTCCGATCTAGGGACCGACAGGGCTTGAG            |
| 4760_Pcsk9_OT170_F | CTACACGACGCTCTTCCGATCTACTAAAGGGCAGAACTCCATCAGC       |
| 4761_Pcsk9_OT170_R | AGACGTGTGCTCTTCCGATCTCTCTACCTGCTTGCCTCTCCTGG         |
| 4762_Pcsk9_OT177_F | CTACACGACGCTCTTCCGATCTAAGGGTGGCTTTTGA CTCTAAGTCC     |
| 4763_Pcsk9_OT177_R | AGACGTGTGCTCTTCCGATCTTCTGATTGCTGGAGTGTTACCC          |
| 4762_Pcsk9_OT234_F | CTACACGACGCTCTTCCGATCTAACTGGTAGCACCTTCTATGCCTCT      |
| 4763_Pcsk9_OT234_R | AGACGTGTGCTCTTCCGATCTACCATCTCTAAAGCTCACCACAGG        |
| 4762_Pcsk9_OT235_F | CTACACGACGCTCTTCCGATCTGGACTCCTTTAATTACAGGGTCAATG     |
| 4763_Pcsk9_OT235_R | AGACGTGTGCTCTTCCGATCTTTTCTCCTCCAAGCCCACCA            |
| 5098_Actb_on_F     | CTACACGACGCTCTTCCGATCTCCAAGTATCCATGAAATAAGTGGTTACAGG |
| 5099_Actb_on_R     | AGACGTGTGCTCTTCCGATCTCTTCATACATCAAGTTGGGGGACA        |
| 5100_Actb_OT1_F    | CTACACGACGCTCTTCCGATCTAAATGAAGCATTAAGGCGGAAGA        |

|                  |                                                     |
|------------------|-----------------------------------------------------|
| 5101_Actb_OT1_R  | AGACGTGTGCTCTTCCGATCTTGGAAACGGCGAAGGCAAC            |
| 5102_Actb_OT2_F  | CTACACGACGCTCTTCCGATCTATAAAAGTGAAGAAGTATTAAGGTGGAAG |
| 5103_Actb_OT2_R  | AGACGTGTGCTCTTCCGATCTGGTGGCTGAGGATTTGGATTG          |
| 5104_Actb_OT3_F  | CTACACGACGCTCTTCCGATCTCACCTCCGCTGCTCATAG            |
| 5105_Actb_OT3_R  | AGACGTGTGCTCTTCCGATCTGGGCTCATCTGCCAGACCAC           |
| 5106_Actb_OT4_F  | CTACACGACGCTCTTCCGATCTTGGGCTGAGGCAGGAATGAG          |
| 5107_Actb_OT4_R  | AGACGTGTGCTCTTCCGATCTGGCTCAGAGTCTTTCCGTCAGG         |
| 5108_Actb_OT5_F  | CTACACGACGCTCTTCCGATCTAAAGTTCTACAATGTGGCTGAGGAC     |
| 5109_Actb_OT5_R  | AGACGTGTGCTCTTCCGATCTACAGAAGCAATGCTGTCACCTC         |
| 5110_Actb_OT6_F  | CTACACGACGCTCTTCCGATCTAAAAATGAGGAAGTATTACTGTGGAAG   |
| 5111_Actb_OT6_R  | AGACGTGTGCTCTTCCGATCTGTGAAGCGGTCGGTTGGAG            |
| 5112_Actb_OT7_F  | CTACACGACGCTCTTCCGATCTCAAGGACAAGGAAGTGGTGGAAAC      |
| 5113_Actb_OT7_R  | AGACGTGTGCTCTTCCGATCTCTGTCCCAGGCTGAGCACTTG          |
| 5114_Actb_OT8_F  | CTACACGACGCTCTTCCGATCTGAGTTATCACCTCCCTTCATAGTCTTC   |
| 5115_Actb_OT8_R  | AGACGTGTGCTCTTCCGATCTAGATGCCTCTAACCAAACCAATG        |
| 5116_Actb_OT9_F  | CTACACGACGCTCTTCCGATCTGTCTACATTATGAAAAACCCATTACTGC  |
| 5117_Actb_OT9_R  | AGACGTGTGCTCTTCCGATCTACACAGCCAGGCACCAGATG           |
| 5118_Actb_OT10_F | CTACACGACGCTCTTCCGATCTTCATCAAGTATGATTGGAAGGGT       |
| 5119_Actb_OT10_R | AGACGTGTGCTCTTCCGATCTCTCCTGAAGAAGTAAGCAATAAAGC      |
| 5120_Actb_OT11_F | CTACACGACGCTCTTCCGATCTGCAATGCTGTCATCTTTTGGTGTAG     |
| 5121_Actb_OT11_R | AGACGTGTGCTCTTCCGATCTAGTCAGTTGTAGCAAGCATCCCC        |
| 5122_Actb_OT12_F | CTACACGACGCTCTTCCGATCTCTCTGTGACTAGCCAACTGCCTG       |
| 5123_Actb_OT12_R | AGACGTGTGCTCTTCCGATCTTGGATGTAGGGGTCTTCTAATGAGTA     |

**Adapter oligo sequences used to anneal and complexing with the Tn5: Oligos were ordered from Integrated DNA Technologies (IDT)**

**Blue: i5 Barcode sequence**

**Red: hyperactive mosaic end for Tn5 transposase recognition**

| Oligo Name   | sequence 5'-3'                                                                       |                            |                                       |
|--------------|--------------------------------------------------------------------------------------|----------------------------|---------------------------------------|
| Tn5-A bottom | [Phos]CTGTCTCTTATACA[ddC]                                                            | <b>i5 Barcode Sequence</b> | <b>i5 Barcode READ (Tx10 for UMI)</b> |
| i5_N50_1_UMI | AATGATACGGCGACCACCGAGATCTACACTAGATCGCNNNNN<br>NNNNNTCGTCGGCAGCGTCAGATGTGTATAAGAGACAG | TAGATC<br>GC               | TAGATCGCTTT<br>TTTTTT                 |
| i5_N50_2_UMI | AATGATACGGCGACCACCGAGATCTACACCTCTCTATNNNNN<br>NNNNTCGTCGGCAGCGTCAGATGTGTATAAGAGACAG  | CTCTCTA<br>T               | CTCTCTATTTTT<br>TTTTTT                |
| i5_N50_3_UMI | AATGATACGGCGACCACCGAGATCTACACTATCCTCTNNNNN<br>NNNNTCGTCGGCAGCGTCAGATGTGTATAAGAGACAG  | TATCCTC<br>T               | TATCCTCTTTTT<br>TTTTTT                |
| i5_N50_4_UMI | AATGATACGGCGACCACCGAGATCTACACAGAGTAGANNNN<br>NNNNNTCGTCGGCAGCGTCAGATGTGTATAAGAGACAG  | AGAGTA<br>GA               | AGAGTAGATTT<br>TTTTTT                 |
| i5_N50_5_UMI | AATGATACGGCGACCACCGAGATCTACACGTAAGGAGNNNN<br>NNNNNTCGTCGGCAGCGTCAGATGTGTATAAGAGACAG  | GTAAGG<br>AG               | GTAAGGAGTTT<br>TTTTTT                 |
| i5_N50_6_UMI | AATGATACGGCGACCACCGAGATCTACACACTGCATANNNN<br>NNNNNTCGTCGGCAGCGTCAGATGTGTATAAGAGACAG  | ACTGCA<br>TA               | ACTGCATATTT<br>TTTTTT                 |
| i5_N50_7_UMI | AATGATACGGCGACCACCGAGATCTACACAAGGAGTANNNN<br>NNNNNTCGTCGGCAGCGTCAGATGTGTATAAGAGACAG  | AAGGAG<br>TA               | AAGGAGTATTT<br>TTTTTT                 |
| i5_N50_8_UMI | AATGATACGGCGACCACCGAGATCTACACCTAAGCCTNNNN<br>NNNNNTCGTCGGCAGCGTCAGATGTGTATAAGAGACAG  | CTAAGC<br>CT               | CTAAGCCTTTT<br>TTTTTT                 |

**i5 oligo sequence for Round 1 and 2 PCR:**

| Oligo Name | sequence 5'-3'                |
|------------|-------------------------------|
| i5         | AATGATACGGCGACCACCGAGATCTACAC |

**i7 Barcoded oligo sequences for Round 2 PCR:**

| Oligo Name | Sequence (5'-3')                                           | i7 Barcode Sequence | i7 BC READ   |
|------------|------------------------------------------------------------|---------------------|--------------|
| i7_N701    | CAAGCAGAAGACGGCATAACGAGATAGCGGAATGTGACTGGAG<br>TTCAGACGTGT | AGCGGAAT            | ATTCCG<br>CT |
| i7_N702    | CAAGCAGAAGACGGCATAACGAGATGATCATGCGTGACTGGAG<br>TTCAGACGTGT | GATCATGC            | GCATGA<br>TG |
| i7_N703    | CAAGCAGAAGACGGCATAACGAGATAAGACGGAGTGACTGGA<br>GTTCAGACGTGT | AAGACGGA            | TCCGTC<br>TT |
| i7_N704    | CAAGCAGAAGACGGCATAACGAGATCGAGTCCTGTGACTGGAG<br>TTCAGACGTGT | CGAGTCCT            | AGGACT<br>CG |
| i7_N705    | CAAGCAGAAGACGGCATAACGAGATTCCTCAGGGTGACTGGAG<br>TTCAGACGTGT | TCCTCAGG            | CCTGAG<br>GA |
| i7_N706    | CAAGCAGAAGACGGCATAACGAGATGTACGGATGTGACTGGAG<br>TTCAGACGTGT | GTACGGAT            | ATCCGT<br>AC |
| i7_N707    | CAAGCAGAAGACGGCATAACGAGATCATCTCTCGTGACTGGAG<br>TTCAGACGTGT | CATCTCTC            | GAGAGA<br>TG |
| i7_N710    | CAAGCAGAAGACGGCATAACGAGATGTCGGAGCGTGACTGGAG<br>TTCAGACGTGT | GTCGGAGC            | GCTCCG<br>AC |
| i7_N711    | CAAGCAGAAGACGGCATAACGAGATACGGAGAAGTGACTGGA<br>GTTCAGACGTGT | ACGGAGAA            | TTCTCC<br>GT |
| i7_N712    | CAAGCAGAAGACGGCATAACGAGATAGGAGATGGTGACTGGA<br>GTTCAGACGTGT | AGGAGATG            | CATCTC<br>CT |
| i7_N714    | CAAGCAGAAGACGGCATAACGAGATAGTACTCGGTGACTGGAG<br>TTCAGACGTGT | AGTACTCG            | CGAGTA<br>CT |
| i7_N715    | CAAGCAGAAGACGGCATAACGAGATGGACTCTAGTGACTGGAG<br>TTCAGACGTGT | GGACTCTA            | TAGAGT<br>CC |

**Supplementary Table 4.** *In vivo* on target analysis at Fah site by UdiTaS.

| Fah_Locus_F                         | Total |        | Indels |       | Forward_insertion |       | Reverse_insertion |       |
|-------------------------------------|-------|--------|--------|-------|-------------------|-------|-------------------|-------|
|                                     | UMI   | Total  | UMI    | Total | UMI               | Total | UMI               | Total |
| Cas9-mSA+biotin Fah exon2-14_D34_R1 | 11659 | 536301 | 348    | 15987 | 1573              | 72371 | 102               | 4711  |
| Cas9-mSA+biotin Fah exon2-14_D34_R2 | 8545  | 393081 | 214    | 9833  | 982               | 45149 | 79                | 3623  |
| Cas9-mSA+biotin Fah exon2-14_D34_R3 | 7442  | 342337 | 152    | 7010  | 726               | 33379 | 54                | 2477  |
| Cas9-mSA+biotin Fah exon2-14_D0_R1  | 9944  | 457415 | 661    | 30407 | 301               | 13861 | 261               | 12014 |
| Cas9-mSA+biotin Fah exon2-14_D0_R2  | 12401 | 570434 | 1067   | 49063 | 362               | 16652 | 264               | 12158 |
| Cas9-mSA+biotin Fah exon2-14_D0_R3  | 13852 | 637179 | 1121   | 51562 | 347               | 15956 | 278               | 12801 |
| biotin Fah exon2-14_D0_R1           | 8189  | 376692 | 4      | 17    | 2                 | 11    | 6                 | 28    |
| biotin Fah exon2-14_D0_R2           | 14337 | 659524 | 6      | 29    | 3                 | 13    | 4                 | 20    |
| biotin Fah exon2-14_D0_R3           | 12283 | 564999 | 6      | 25    | 2                 | 9     | 0                 | 0     |

|                                     | Total |        | Indels |       | Forward_insertion |       | Reverse_insertion |       |
|-------------------------------------|-------|--------|--------|-------|-------------------|-------|-------------------|-------|
|                                     | UMI   | Total  | UMI    | Total | UMI               | Total | UMI               | Total |
| <b>Fah_Locus_R</b>                  |       |        |        |       |                   |       |                   |       |
| Cas9-mSA+biotin Fah exon2-14_D34_R1 | 3848  | 158788 | 135    | 3781  | 545               | 23229 | 42                | 23229 |
| Cas9-mSA+biotin Fah exon2-14_D34_R2 | 2314  | 106091 | 62     | 2321  | 252               | 9151  | 31                | 9151  |
| Cas9-mSA+biotin Fah exon2-14_D34_R3 | 2904  | 137508 | 66     | 4552  | 280               | 14856 | 33                | 14856 |
| Cas9-mSA+biotin Fah exon2-14_D0_R1  | 3235  | 138303 | 226    | 9965  | 94                | 3153  | 71                | 3153  |
| Cas9-mSA+biotin Fah exon2-14_D0_R2  | 4026  | 179875 | 293    | 16159 | 124               | 4754  | 89                | 4754  |
| Cas9-mSA+biotin Fah exon2-14_D0_R3  | 4677  | 189455 | 349    | 17497 | 135               | 5037  | 112               | 5037  |
| biotin Fah exon2-14_D0_R1           | 2704  | 122660 | 1      | 3     | 1                 | 3     | 2                 | 3     |
| biotin Fah exon2-14_D0_R2           | 4415  | 215671 | 2      | 8     | 1                 | 4     | 1                 | 4     |
| biotin Fah exon2-14_D0_R3           | 4001  | 161822 | 2      | 7     | 1                 | 2     | 0                 | 0     |

|                                     | Forward_insertion |       | Imprecise |       | precise |       | Imprecise % | precise % |
|-------------------------------------|-------------------|-------|-----------|-------|---------|-------|-------------|-----------|
|                                     | UMI               | Total | UMI       | Total | UMI     | Total |             |           |
| <b>Fah_Locus_F</b>                  |                   |       |           |       |         |       |             |           |
| Cas9-mSA+biotin Fah exon2-14_D34_R1 | 1573              | 72371 | 1509      | 70658 | 64      | 1713  | 95.93%      | 4.07%     |
| Cas9-mSA+biotin Fah exon2-14_D34_R2 | 982               | 45149 | 955       | 44080 | 27      | 1069  | 97.25%      | 2.75%     |
| Cas9-mSA+biotin Fah exon2-14_D34_R3 | 726               | 33379 | 697       | 32589 | 29      | 790   | 96.01%      | 3.99%     |
| Cas9-mSA+biotin Fah exon2-14_D0_R1  | 301               | 13861 | 293       | 13533 | 8       | 328   | 97.34%      | 2.66%     |
| Cas9-mSA+biotin Fah exon2-14_D0_R2  | 362               | 16652 | 356       | 16258 | 6       | 394   | 98.34%      | 1.66%     |
| Cas9-mSA+biotin Fah exon2-14_D0_R3  | 347               | 15956 | 339       | 15578 | 8       | 378   | 97.69%      | 2.31%     |

|                                     | Forward_insertion |       | Imprecise |       | precise |       | Imprecise % | precise % |
|-------------------------------------|-------------------|-------|-----------|-------|---------|-------|-------------|-----------|
|                                     | UMI               | Total | UMI       | Total | UMI     | Total |             |           |
| <b>Fah_Locus_R</b>                  |                   |       |           |       |         |       |             |           |
| Cas9-mSA+biotin Fah exon2-14_D34_R1 | 545               | 23229 | 524       | 23182 | 21      | 47    | 96.15%      | 3.85%     |
| Cas9-mSA+biotin Fah exon2-14_D34_R2 | 252               | 9151  | 243       | 8546  | 9       | 605   | 96.43%      | 3.57%     |
| Cas9-mSA+biotin Fah exon2-14_D34_R3 | 280               | 14856 | 271       | 14510 | 9       | 346   | 96.79%      | 3.21%     |
| Cas9-mSA+biotin Fah exon2-14_D0_R1  | 94                | 3153  | 93        | 2914  | 1       | 239   | 98.94%      | 1.06%     |
| Cas9-mSA+biotin Fah exon2-14_D0_R2  | 124               | 4754  | 121       | 4237  | 3       | 517   | 97.58%      | 2.42%     |
| Cas9-mSA+biotin Fah exon2-14_D0_R3  | 135               | 5037  | 132       | 4599  | 3       | 438   | 97.78%      | 2.22%     |

## Supplementary Sequences 1. Sequences of donors used in this study

biotin-iGUIDE donor

bio/G\*C\*TCGCGTTTAATTGAGTTGTCATATGTTAATAACGGTATACGC\*G\*A

phospho-iGUIDE donor

p-G\*C\*TCGCGTTTAATTGAGTTGTCATATGTTAATAACGGTATACGC\*G\*A

biotin-GUIDE donor

bio/G\*T\*TTAATTGAGTTGTCATATGTTAATAACGGT\*A\*T

phospho-GUIDE donor

p-G\*T\*TTAATTGAGTTGTCATATGTTAATAACGGT\*A\*T

IRES-GFP-pA (1.7Kb)

GCCGCTCTAGAACTAGTGGATCCGAGATCGAGTGCCGCATCACCGGCAATTGACGCGTGCTCCTCTCCCTCCCCCCCCCT  
AACGTTACTGGCCGAAGCCGCTTGGAAATAAGGCCGGTGTGCGTTTGTCTATATGTTATTTTCCACCATATTGCCGTCTTTT  
GGCAATGTGAGGGCCCGGAAACCTGGCCCTGTCTTCTTGACGAGCATTCTAGGGGTCTTTCCCTCTCGCCAAAGGAATG  
CAAGGTCTGTTGAATGTCGTGAAGGAAGCAGTTCTCTGGAAGCTTCTTGAAGACAAACAACGTCTGTAGCGACCCTTTGC  
AGGCAGCGGAACCCCCACCTGGCGACAGGTGCCCTCTGCGGCCAAAAGCCACGTGTATAAGATACACCTGCAAAGGCGGCA  
CAACCCAGTGCCACGTTGTGAGTTGGATAGTTGTGGAAGAGTCAAATGGCTCTCCTCAAGCGTATTCAACAAGGGGCTG  
AAGGATGCCCAGAAGGTACCCCATTTGTATGGGATCTGATCTGGGGCCTCGGTACACATGCTTTACATGTGTTTGTAGTCGAGG  
TTAAAAAACGTCTAGGCCCCCGAACCACGGGGACGTGGTTTTCTTTGAAAAACACGATGATAAATATGGCCACAATGGT  
GAGCAAGGGCGAGGAGCTGTTACCGGGGTGGTGCCCATCTGGTTCGAGCTGGACGGCGACGTAACGGCCACAAGTTTCAG  
CGTGTCGGCGAGGGCGAGGGCGATGCCACCTACGGCAAGCTGACCCTGAAGTTCATCTGCACCACCGGCAAGCTGCCCGT  
GCCCTGGCCACCCTCGTGACCACCTGACCTACGGCGTGCAGTGCTTCAGCCGTACCCCGACCACATGAAGCAGCACGA  
CTTCTTCAAGTCCGCCATGCCCGAAGGCTACGTCCAGGAGCGCACCATCTTCTTCAAGGACGACGGCAACTACAAGACCCG  
CGCCGAGGTGAAGTTCGAGGGCGACACCCTGGTGAACCGCATCGAGCTGAAGGGCATCGACTTCAAGGAGGACGGCAACAT  
CCTGGGGCACAAGCTGGAGTACAACACTACAACAGCCACAACGTCTATATCATGGCCGACAAGCAGAAGAACGGCATCAAGGT  
GAACTTCAAGATCCGCCACAACATCGAGGACGGCAGCGTGCAGCTCGCCGACCACTACCAGCAGAACACCCCCATCGGCGA  
CGCCCCGTGCTGCTGCCCGACAACCACTACCTGAGCACCAGTCCGCCCTGAGCAAAGACCCCCAACGAGAAGCGCGATCA  
CATGGTCTGCTGGAGTTCGTGACCGCCGCGGGATCACTCTCGGCATGGACGAGCTGTACAAGTAAATGCATCGATGATC  
TAGAGCTCGCTGATCAGCCTCGACTGTGCCTTCTAGTTGCCAGCTATCTGTTGTTTGGCCCTCCCCCGTGCCTTCTTGC  
CCTGGAAGGTGCCACTCCCACTGTCTTTCTAATAAAATGAGGAAATTCATCGCATTGTCTGAGTAGGTGTCAATCTAT  
TCTGGGGGTGGGGTGGGGCAGGACAGCAAGGGGAGGATTGGGAAGACAATAGCAGGCATGCTGGGGATGCGGTGGGCTC  
TATGGATAACTTCGTATAGCATAACATTATACGAAGTTATCGGAACCCTTAATGTGAGGGGGGGCCCGGTACCAGCTTTTG  
TTCCCTTTAGTGAGGGTTAATTGCGCGCTTGGCGTAATCATGGTCATAGCTGTTTCTGTGTGAAATTGTTATCCGT

IRES-GFP-pA (2.5Kb)

GCCGCTCTAGAACTAGTGGATCCGAGATCGAGTGCCGCATCACCGGCAATTGACGCGTGCTCCTCTCCCTCCCCCCCCCT  
AACGTTACTGGCCGAAGCCGCTTGGAAATAAGGCCGGTGTGCGTTTGTCTATATGTTATTTTCCACCATATTGCCGTCTTTT  
GGCAATGTGAGGGCCCGGAAACCTGGCCCTGTCTTCTTGACGAGCATTCTAGGGGTCTTTCCCTCTCGCCAAAGGAATG  
CAAGGTCTGTTGAATGTCGTGAAGGAAGCAGTTCTCTGGAAGCTTCTTGAAGACAAACAACGTCTGTAGCGACCCTTTGC  
AGGCAGCGGAACCCCCACCTGGCGACAGGTGCCCTCTGCGGCCAAAAGCCACGTGTATAAGATACACCTGCAAAGGCGGCA  
CAACCCAGTGCCACGTTGTGAGTTGGATAGTTGTGGAAGAGTCAAATGGCTCTCCTCAAGCGTATTCAACAAGGGGCTG  
AAGGATGCCCAGAAGGTACCCCATTTGTATGGGATCTGATCTGGGGCCTCGGTACACATGCTTTACATGTGTTTGTAGTCGAGG  
TTAAAAAACGTCTAGGCCCCCGAACCACGGGGACGTGGTTTTCTTTGAAAAACACGATGATAAATATGGCCACAACCAT  
GGTGAGCAAGGGCGAGGAGCTGTTACCGGGGTGGTGCCCATCTGGTTCGAGCTGGACGGCGACGTAACGGCCACAAGTT  
CAGCGTGTCCGGCGAGGGCGAGGGCGATGCCACCTACGGCAAGCTGACCCTGAAGTTCATCTGCACCACCGGCAAGCTGCC  
CGTGCCCTGGCCACCCTCGTGACCACCTGACCTACGGCGTGCAGTGCTTCAGCCGTACCCCGACCACATGAAGCAGCA  
CGACTTCTTCAAGTCCGCCATGCCCGAAGGCTACGTCCAGGAGCGCACCATCTTCTTCAAGGACGACGGCAACTACAAGAC  
CCGCGCCGAGGTGAAGTTCGAGGGCGACACCCTGGTGAACCGCATCGAGCTGAAGGGCATCGACTTCAAGGAGGACGGCAA  
CATCCTGGGGCACAAGCTGGAGTACAACACTACAACAGCCACAACGTCTATATCATGGCCGACAAGCAGAAGAACGGCATCAA  
GGTGAACCTTCAAGATCCGCCACAACATCGAGGACGGCAGCGTGCAGCTCGCCGACCACTACCAGCAGAACACCCCCATCGG  
CGACGGCCCCGTGCTGCTGCCCGACAACCACTACCTGAGCACCAGTCCGCCCTGAGCAAAGACCCCCAACGAGAAGCGCGA  
TCACATGGTCTGCTGGAGTTCGTGACCGCCGCGGGATCACTCTCGGCATGGACGAGCTGTACAAGTAAATGCATCGATG

ATCTAGAGCTCGCTGATCAGCCTCGACTGTGCCTTCTAGTTGCCAGCTATCTGTTGTTTGCCCCCTCCCCCGTGCCTTCCTT  
GACCCTGGAAGGTGCCACTCCCCTGTCCTTTTCTAATAAAAATGAGGAAATTGCATCGCATTGTCTGAGTAGGTGTCATTC  
TATTCTGGGGGGTGGGGTGGGGCAGGACAGCAAGGGGGAGGATTGGGAAGACAATAGCAGGCATGCTGGGGATGCGGTGGG  
CTCTATGGATAACTTCGTATAGCATAACATTATACGAAGTTATCGGAACCCTTAATGTCGAGGGGGGGCCCGGTACCAGCTT  
TTGTTCCCTTTAGTGAGGGTTAATTGCGCGCTTGGCGTAATCATGGTCATAGCTGTTTCCTGTGTGAAATTGTTATCCGCT  
CACAATTCACACAACATAACGAGCCGGAAGCATAAAGTGTAAGCCTGGGGTGCCTAATGAGTGAGCTAACTCACATTAAT  
TGCGTTGCGCTCACTGCCCGCTTTCAGTCGGGAAACCTGTGCTGCCAGCTGCATTAATGAATCGGCCAACGCGCGGGGAG  
AGGCGGTTTGCGTATTGGGCGCTCTTCCGCTTCCCTCGCTCACTGACTCGCTGCGCTCGGTGCTCGGCTGCGGCGAGCGGT  
ATCAGTCACTCAAAGGCGGTAATACGGTTATCCACAGAATCAGGGGATAACGCAGGAAAGAACATGTGAGCAAAGGCCA  
GCAAAAGGCCAGGAACCGTAAAAAGCCGCGTGTGCTGGCGTTTTTCCATAGGCTCCGCCCCCTGACGAGCATCACAAAA  
TCGACGCTCAAGTCAGAGGTGGCGAAACCCGACAGGACTATAAAGATAACCAGGCGTTTTCCCCCTGGAAGCTCCCTCGTGCG  
CTCTCCTGTTCCGACCCTGCCGCTTACCGGATACTGTCCGCTTTCTCCCTTCGGGAAGCGTGGCGTTTTCTCATAGCTC  
ACGCTGTAGGTATCTCAGTTCGGTGTAGGTGCTTCGCTCCAAGCTGGGCTGTGTGCACGAACCCCCCGTTTCCAGCCGACCG  
CTGCGCCTTATCCGGTAACATATCGTCTTGAGTCCAACCCGGTAAGACACGACTTATCGCCACTGG

### IRES-GFP-pA (3.5Kb)

GCCGCTCTAGAACTAGTGATCCGAGATCGAGTGCCGCATCACCGCAATTGACGCGTGCTCCTCTCCCTCCCCCCCCCT  
AACGTTACTGGCCGAAGCCGCTTGAATAAGGCCGGTGTGCGTTTGTCTATATGTTATTTTCCACCATATTGCCGTCTTTT  
GGCAATGTGAGGGCCCGAAACCTGGCCCTGTCTTCTTGACGAGCATTCTAGGGTCTTTCCCTCTCGCCAAAGGAATG  
CAAGGTCTGTTGAATGTCGTGAAGGAAGCAGTTCCTCTGGAAGCTTCTTGAAGACAAACAACGTCTGTAGCGACCCTTGC  
AGGCAGCGGAACCCCCACCTGGCGACAGGTGCCTCTGCGGCCAAAAGCCACGTGTATAAGATACACCTGCAAAGGCGGCA  
CAACCCAGTGCCACGTTGTGAGTTGGATAGTTGTGGAAGAGTCAAATGGCTCTCCTCAAGCGTATTCAACAAGGGGCTG  
AAGGATGCCCAGAAGGTACCCCATTTGTATGGGATCTGATCTGGGGCCTCGGTACACATGCTTTACATGTGTTTAGTCGAGG  
TTAAAAAACGTCTAGGCCCCCGAACCACGGGGACGTGGTTTTCTTTGAAAAACACGATGATAATATGGCCACAACCAT  
GGTGAGCAAGGGCGAGGAGCTGTTACCCGGGGTGGTGCCCATCTGGTTCGAGCTGGACGGCGACGTAAACGGCCACAAGTT  
CAGCGTGTCCGGCGAGGGCGAGGGCGATGCCACCTACGGCAAGCTGACCCTGAAGTTCATCTGCACCACCGGCAAGCTGCC  
CGTGCCCTGGCCCACCCTCGTGACCACCCTGACCTACGGCGTGCAGTGCTTCAGCCGCTACCCCGACCACATGAAGCAGCA  
CGACTTCTTCAAGTCCGCCATGCCCGAAGGCTACGTCCAGGAGCGCACCATCTTCTTCAAGGACGACGGCAACTACAAGAC  
CCGCGCCGAGGTGAAGTTCGAGGGCGACACCCTGGTGAACCGCATCGAGCTGAAGGGCATCGACTTCAAGGAGGACGGCAA  
CATCCTGGGGCACAAGCTGGAGTACAACATAACAGCCACAACGTCATATCATGGCCGACAAGCAGAAGAACGGCATCAA  
GGTGAACCTTCAAGATCCGCCACAACATCGAGGACGGCAGCGTGCAGCTCGCCGACCCTACCAGCAGAACACCCCCATCGG  
CGACGGCCCCGTGCTGCTGCCCGACAACCACTACCTGAGCACCAGTCCGCCCTGAGCAAAGACCCCAACGAGAAGCGCGA  
TCACATGGTCTGCTGGAGTTGCTGACCGCCGCGGGATCACTCTCGGCATGGACGAGCTGTACAAGTAAATGCATCGATG  
ATCTAGAGCTCGCTGATCAGCCTCGACTGTGCCTTCTAGTTGCCAGCTATCTGTTGTTTGCCCCCTCCCCCGTGCCTTCCTT  
GACCCTGGAAGGTGCCACTCCCCTGTCCTTTTCTAATAAAAATGAGGAAATTGCATCGCATTGTCTGAGTAGGTGTCATTC  
TATTCTGGGGGGTGGGGTGGGGCAGGACAGCAAGGGGGAGGATTGGGAAGACAATAGCAGGCATGCTGGGGATGCGGTGGG  
CTCTATGGATAACTTCGTATAGCATAACATTATACGAAGTTATCGGAACCCTTAATGTCGAGGGGGGGCCCGGTACCAGCTT  
TTGTTCCCTTTAGTGAGGGTTAATTGCGCGCTTGGCGTAATCATGGTCATAGCTGTTTCCTGTGTGAAATTGTTATCCGCT  
CACAATTCACACAACATAACGAGCCGGAAGCATAAAGTGTAAGCCTGGGGTGCCTAATGAGTGAGCTAACTCACATTAAT  
TGCGTTGCGCTCACTGCCCGCTTTCAGTCGGGAAACCTGTGCTGCCAGCTGCATTAATGAATCGGCCAACGCGCGGGGAG  
AGGCGGTTTGCGTATTGGGCGCTCTTCCGCTTCCCTCGCTCACTGACTCGCTGCGCTCGGTGCTCGGCTGCGGCGAGCGGT  
ATCAGTCACTCAAAGGCGGTAATACGGTTATCCACAGAATCAGGGGATAACGCAGGAAAGAACATGTGAGCAAAGGCCA  
GCAAAAGGCCAGGAACCGTAAAAAGCCGCGTGTGCTGGCGTTTTTCCATAGGCTCCGCCCCCTGACGAGCATCACAAAA  
TCGACGCTCAAGTCAGAGGTGGCGAAACCCGACAGGACTATAAAGATAACCAGGCGTTTTCCCCCTGGAAGCTCCCTCGTGCG  
CTCTCCTGTTCCGACCCTGCCGCTTACCGGATACTGTCCGCTTTCTCCCTTCGGGAAGCGTGGCGTTTTCTCATAGCTC  
ACGCTGTAGGTATCTCAGTTCGGTGTAGGTGCTTCGCTCCAAGCTGGGCTGTGTGCACGAACCCCCCGTTTCCAGCCGACCG  
CTGCGCCTTATCCGGTAACATATCGTCTTGAGTCCAACCCGGTAAGACACGACTTATCGCCACTGGCAGCAGCCACTGGTAA  
CAGGATTAGCAGAGCGAGGTATGTAGGCGGTGCTACAGAGTTCCTTGAAGTGGTGGCCTAACTACGGCTACACTAGAAGGAC  
AGTATTTGGTATCTGCGCTCTGCTGAAGCCAGTTACCTTCGAAAAAGAGTTGGTAGCTCTTGATCCGGCAAACAACAC  
CGCTGGTAGCGGTGTTTTTTTTGTTTTGCAAGCAGCAGATTACGCGCAGAAAAAAGGATCTCAAGAAGATCCTTTGATCTT  
TTCTACGGGGTCTGACGCTCAGTGGAACGAAAACCTACGTTAAGGGATTTTGGTTCATGAGATTATCAAAAAGGATCTTAC  
CTAGATCCTTTTAAATTAATAAATGAAGTTTTAAATCAATCTAAAGTATATATGAGTAAACTTGGTCTGACAGTTACCAATG  
CTTAATCAGTGAGGCACCTATCTCAGCGATCTGTCTATTTTCGTTTCATCCATAGTTGCCTGACTCCCCGTGCTGTAGATAAC  
TACGATACGGGAGGGCTTACCATCTGGCCCAGTGTGCAATGATACCGCGAGACCCACGCTCACCGGCTCCAGATTTATC  
AGCAATAAACCAGCCAGCCGGAAGGGCCGAGCGCAGAAGTGGTCTGCAACTTTATCCGCTCCATCCAGTCTATTAATTG  
TTGCCGGGAAGCTAGAGTAAGTAGTTCCGCGAGTTAATAGTTTGCGCAACGTTGTTGCCATTGCTACAGGCATCGTGGTGT  
ACGCTCGTCTGTTTTGGTATGGCTTCATTCAGCTCCGGTTCCCAACGATCAAGGCGAGTTACATGATCCCCCATGTTGTGCAA

AAAAGCGTTAGCTCCTTCGGTCTCCGATCGTTGTCAGAAGTAAGTTGGCCGCAGTGTTATCACTCATGGTTATGGCAGC  
ACTGCATAATTCTCTTACTGTTCATGCCATCCGT

IRES-GFP-pA (4.5Kb)

GCCGCTCTAGAAGTAGTGATCCGAGATCGAGTGCCTGCATCACCGGCAATTGACGCGTGCTCCTCTCCCTCCCCCCCCCT  
AACGTTACTGGCCGAAGCCGCTTGGAAATAAGCCGGTGTGCGTTTGTCTATATGTTATTTTCCACCATATTGCCGTCTTTT  
GGCAATGTGAGGGCCGGAAACCTGGCCCTGTCTTCTTGACGAGCATTCTAGGGGTCTTTCCCTCTCGCCAAAAGGAATG  
CAAGGTCTGTTGAATGTCGTGAAGGAAGCAGTTCCCTCTGGAAGCTTCTTGAAGACAAACAACGTCTGTAGCGACCCTTTGC  
AGGCAGCGGAACCCCCACCTGGCGACAGGTGCCCTCTGCGGCCAAAAGCCACGTGTATAAGATACACCTGCAAAGGCGGCA  
CAACCCAGTGCCACGTTGTGAGTTGGATAGTTGTGGAAGAGTCAAATGGCTCTCCTCAAGCGTATTCAACAAGGGGCTG  
AAGGATGCCAGAAGGTACCCCATTTGTATGGGATCTGATCTGGGGCTCGGTACACATGCTTTACATGTGTTTGTAGTCGAGG  
TTAAAAAACGTTCTAGGCCCCCGAACCACGGGGACGTGGTTTTCTTTTGA AAAACACGATGATAATATGGCCACAACCAT  
GGTGAGCAAGGGCGAGGAGCTGTTTACCAGGGTGGTGGCCATCCTGGTCGAGCTGGACGGCGACGTAAACGGCCACAAGTT  
CAGCGTGTCCGGCGAGGGCGAGGGCGATGCCACCTACGGCAAGCTGACCCTGAAGTTCATCTGCACCACCGCAAGCTGCC  
CGTGCCCTGGCCACCCTCGTGACCACCTGACCTACGGCGTGCAGTGTTCAGCCGCTACCCCGACCACATGAAGCAGCA  
CGACTTCTTCAAGTCCGCCATGCCCGAAGGCTACGTCAGGAGCGCACCATCTTCTTCAAGGACGACGGCAACTACAAGAC  
CCGCGCCGAGGTGAAGTTCGAGGGCGACACCCTGGTGAACCGCATCGAGCTGAAGGGCATCGACTTCAAGGAGGACGGCAA  
CATCCTGGGGCACAAGCTGGAGTACAACATAACAGCCACAACGTCTATATCATGGCCGACAAGCAGAAGAACGGCATCAA  
GGTGAACCTTCAAGATCCGCCACAACATCGAGGACGGCAGCGTGCAGCTCGCCGACCCTACCAGCAGAACACCCCATCGG  
CGACGGCCCCGTGCTGCTGCCCGACAACCACTACCTGAGCACCCAGTCCGCCCTGAGCAAAGACCCCAACGAGAAGCGCGA  
TCACATGGTCTCTGCTGGAGTTTCGTGACCGCCGCGGGATCACTCTCGGCATGGACGAGCTGTACAAGTAAATGCATCGATG  
ATCTAGAGCTCGCTGATCAGCCTCGACTGTGCCTTCTAGTTGCCAGCTATCTGTTGTTTTGCCCTCCCCCGTGCCTTCCTT  
GACCCTGGAAGGTGCCACTCCCCTGTCCTTTCTTAATAAAATGAGGAAATTGCATCGCATTGTCTGAGTAGGTGTCATTC  
TATCTGGGGGGTGGGGTGGGGCAGGACAGCAAGGGGGAGGATTGGGAAGACAATAGCAGGCATGCTGGGGATGCGGTGGG  
CTCTATGGATAACTTCGTATAGCATAACATTATACGAAGTTATCGGAACCCCTAATGTGAGGGGGGGCCCGGTACCAGCTT  
TTGTTCCTTTAGTGAGGGTTAATTCGCGCTTGGCGTAATCATGGTCATAGCTGTTTCTGTGTGAAATTGTTATCCGCT  
CACAATTCACACAACATAACGAGCCGGAAGCATAAAGTGTAAGCCCTGGGGTGCCTAATGAGTGAGCTAACTCACATTAAT  
TGCGTTGCGCTCACTGCCCCGCTTCCAGTCGGGAAACCTGTGCTGCCAGCTGCATTAATGAATCGGCCAACGCGCGGGGAG  
AGGCGGTTTGCATTTGGGCGCTCTTCCGCTTCCCTCGCTCACTGACTCGCTGCGCTCGGTCTCGGTCTCGGCTGCGGGCAGCGGT  
ATCAGTCACTCAAAGGCGGTAATACGGTTATCCACAGAATCAGGGGATAACGCAGGAAAGAACATGTGAGCAAAGGCCA  
GCAAAGGCCAGGAACCGTAAAAAGGCCGCGTGTGCTGGCGTTTTTCCATAGGCTCCGCCCCCTGACGAGCATCACAAAA  
TCGACGCTCAAGTCAGAGGTGGCGAAACCCGACAGGACTATAAAGATAACCAGGCGTTTCCCCCTGGAAGCTCCCTCGTGCG  
CTCTCTGTTCCGACCCTGCCGCTTACCGGATACTGTCCGCTTCTCCTTTCGGGAAGCGTGGCGCTTCTCATAGCTC  
ACGCTGTAGGTATCTCAGTTCGGTGTAGGTGCTTCGCTCCAAGCTGGGCTGTGTGCACGAACCCCGTTTACGCCGACCG  
CTGCGCCTTATCCGGTAACTATCGTCTTGAGTCCAACCCGGTAAGACACGACTTATCGCCACTGGCAGCAGCCACTGGTAA  
CAGGATTAGCAGAGCGAGGTATGTAGGCGGTGCTACAGAGTTCTTGAAGTGGTGGCCTAACTACGGCTACACTAGAAGGAC  
AGTATTTGGTATCTGCGCTCTGCTGAAGCCAGTTACCTTCGGAAAAAGAGTTGGTAGCTCTTGATCCGGCAAACAACCCAC  
CGCTGGTAGCGGTGGTTTTTTTTGTTTGCAAGCAGCAGATTACGCGCAGAAAAAAGGATCTCAAGAAGATCCTTTGATCTT  
TTCTACGGGGTCTGACGCTCAGTGGAAACGAAAACCTACGTTAAGGGATTTTGGTCATGAGATTATCAAAAAGGATCTTAC  
CTAGATCCTTTTAAATTA AAAATGAAGTTTTAAATCAATCTAAAGTATATATGAGTAACTTGGTCTGACAGTTACCAATG  
CTTAATCAGTGAGGCACCTATCTCAGCGATCTGTCTATTTTCGTTTATCCATAGTTGCCTGACTCCCCGTGCTGTAGATAAC  
TACGATACGGGAGGGCTTACCATCTGGCCCCAGTGTGCAATGATACCGCGAGACCCACGCTCACCGGCTCCAGATTTATC  
AGCAATAAACAGCCAGCCGGAAGGGCCGAGCGCAGAAGTGGTCTGCAACTTTATCCGCTCCATCCAGTCTATTAATTG  
TTGCCGGGAAGCTAGAGTAAGTAGTTCGCCAGTTAATAGTTTGC GCAACGTTGTTGCCATTGCTACAGGCATCGTGGTGTG  
ACGCTCGTCTGTTTTGGTATGGCTTCATTCAGCTCCGGTTCCCAACGATCAAGGCGAGTTACATGATCCCCATGTTGTGCAA  
AAAAGCGTTAGCTCCTTCGGTCTCCGATCGTTGTCAGAAGTAAGTTGGCCGCAGTGTTATCACTCATGGTTATGGCAGC  
ACTGCATAATTCTCTTACTGTTCATGCCATCCGTAAGATGCTTTTTCTGTGACTGGTGGTACTCAACCAAGTCATTCTGAGA  
ATAGTGTATGCGGCGACCGAGTTGCTCTTGGCCGCGTCAATACGGGATAATACCGCGCCACATAGCAGAACTTTAAAAGT  
GCTCATCATTGGAAAACGTTCTTCCGGGGCGAAAACCTCAAGGATCTTACCCTGTTGAGATCCAGTTCCGATGTAACCCAC  
TCGTGCACCCAACTGATCTTACGATCTTTTACTTTTACCAGCGTTTCTGGGTGAGCAAAAACAGGAAGGCAAAAATGCCGC  
AAAAAAGGAATAAGGGCGACACGGAAATGTTGAATACTCATACTCTTCTTTTCAATATTATTGAAGCATTATCAGGG  
TTATTGTCTCATGAGCGGATACATAATTTGAATGTATTTAGAAAAATAAACAATAAGGGGTTCCGCGCACATTTCCCGAAA  
AGTGCCACCTAAATTGTAAGCGTTAATATTTTGTAAATTCGCGTTAAATTTTTGTTAAATCAGCTCATTTTTTAACCAA  
TAGGCCGAAATCGCAAATCCCTTATAAATCAAAAAGAAATAGACCGAGATAGGGTTGAGTGTGTTCCAGTTTGAACAAG  
AGTCCACTATTAAGAACGTGGACTCCAACGTCAAAGGGCGAAAAACCGTCTATCAGGGCGATGGCCACTACGTGAACCA  
TCACCTAATCAAGTTTTTTTTGGGGTGGAGGTGCCGTAAGCACTAAATCGGAACCCCTAAAGGGAGCCCCGATTTAGAGCT  
TGACGGGGAAGCCGCGCAACGTGGCGAGAAAGGAAGGAAGAAAGCGAAAGGAGCGGGCGCTAGGGCGCTGGCAAGTGTGTA

GCGGTCACGCTGCGCGTAACCACCACACCCGCCGCGCTTAATGCGCCGCTACAGGGCGCGTCCCATTCGCCATTCAGGCTG  
CGCAACTGTTGGGAAGGGCGATCGGTGCGGGCCTCTT

### Fah-exon 2-14: SA-Exon2-14-pA

TTTATAAGGGTTGTCTCAAAGGAAACCATGAGTCCCTAAGTATTTGCTGTTATAGTAAATGTGCTGTGCCTGTCAGAACTG  
GCTGTCATTCTTCTCCTAGCCAAAAGCCACGGATTGGTGTAGCCATCGGTGACCAGATCTTGGACCTGAGTGTTCATTAACA  
CCTCTTTACCGGACCTGCCCTTTCCAAACATCAACATGTCTTCGATGAGACAACCTCTCAATAACTTCATGGGTCTGGGTCA  
AGCTGCATGGAAGGAGGCAAGAGCATCCTTACAGAACCTACTGTCTGCCAGCCAAGCCCGGCTCAGAGATGACAAGGAGCT  
TCGGCAGCGTGCATTCACCTCCCAGGCTTCTGCGACAATGCACCTTCCTGCTACCATAGGAGACTACACGGACTTCTACTC  
TTCTCGGCAGCATGCCACCAATGTTGGCATTATGTTTCAGAGGCAAGGAGAATGCGCTGTTGCCAAAATTGGCTCCACTTACC  
TGTGGGATACCATGGCCGAGCTTCTCCATTGTGGTATCTGGAACCCCGATTTCGAAGACCCATGGGGCAGATGAGACCTGA  
TAACTCAAAGCCTCCTGTGTATGGTGCCTGCAGACTCTTAGACATGGAGTTGGAAATGGCTTTCTTCGTAGGCCCTGGGAA  
CAGATTTCGGAGAGCCAATCCCCATTTCCAAAGCCCATGAACACATTTTTCGGGATGGTCCCTCATGAACGACTGGAGCGCAG  
AGACATCCAGCAATGGGAGTACGTCCCCTTGGGCCATTCTGGGGAAAAGCTTTGGAACCACAATCTCCCCGTGGGTGGT  
GCCTATGGATGCCCTCATGCCCTTTGTGGTGCCAAACCCAAAGCAGGACCCCAAGCCCTTGCATATCTCTGCCACAGCCA  
GCCCTACACATTTGATATCAACCTGTCTGTCTCTTTGAAAGGAGAAGGAATGAGCCAGGCGGCTACCATCTGCAGGTCTAA  
CTTTAAGCACATGTACTGGACCATGCTGCAGCAACTCACACACCCTCTGTTAATGGATGCAACCTGAGACCTGGGGACCT  
CTTGGCTTCTGGAACCATCAGTGGATCAGACCCCTGAAAGCTTTGGCTCCATGCTGGAACCTGTCTGGAAGGGAACAAAGGC  
CATCGATGTGGAGCAGGGCAGACCAGGACCTTCTGCTGGACGGCGATGAAGTCATCATAACAGGTCACCTGCCAGGGGGA  
CGGCTACCGTGTGGCTTTGGCCAGTGTGCTGGGAAAGTGTGCTGCCCTTTCACCAGCCTGAGCGGCCCTAGAGTCGGG  
GCGGCCGCGCCTTCGAGCAGACATGATAAGATACATTTGATGAGTTTGGACAAACCACAACCTAGAATGCAGTGAAAAAAT  
GCTTTATTTGTGAAATTTGTGATGCTATTGCTTTATTTGTAACCATTATAAGCTGCAATAAACAAGTTAACAACAACAATT  
GCATTCATTTTATGTTTCAGGTTTCAGGGGAGGTGTGGGAGGTTTTTTAAAGCAAGTAAAACCTCTACAAATGTGGTAAAA  
TCGATAAGGATCT

### Supplementary Sequences 2. Protein Sequences of Cas9-mSA and Cas9-mSA\* used in this study

SpyCas9-mSA: FLAG-SV40\_NLS-SpyCas9-Igk leader-mSA

MDYKDHGDYKDHDIDYKDDDDKMAPKKKRKVGIHGVPAAADKKYSIGLDIGTNSVGVAVITDEYKVPSSKKFKVLGNTDRHS  
IKKNLIGALLFDSGETAEATRLKRTARRRYTRRKNRICYLQEIFSNEMAKVDDSFHRLEESFLVEEDKKHERHPIFGNIV  
DEVAYHEKYPTIYHLRKKLVSDTKADLRLIYLALAHMIKFRGHFLIEGDLNPDNSDVKLFIQLVQTYNQLFEEENPINAS  
GVDAKAILSARLSKSRLENLIAQLPGEKKNLFGNLIALSLGLTPNFKSNFDLAEDAKLQLSKDYDDDLNLLAQIGDQ  
YADLFLAAKNLSDAILLSDILRVNTEITKAPLSASMIKRYDEHHQDLTLLKALVRQQLPEKYKEIFFDQSKNGYAGYIDGG  
ASQEEFYKFIKPILEKMDGTEELLVKNLREDLLRKQRTFDNGSIPHQIHLGELHAILRRQEDFYPFKDNREKIEKILTFR  
IPYYVGPLARGNSRFAWMTRKSEETITPWNFEVVDKVGASQSFIERMTNFDKPNLPEKVLPHKSLLEYFTVYNELTKVK  
YVTEGMRKPAFLSGEQKKAIVDLLFKTNRKVTVKQLKEDYFKKIECFDSVEISGVEDRFNASLGTYHDLLKIIKDKDFLDN  
EENEDILEDIVLTLTLFEDREMIERLKYAHLFFDKVMKQLKRRRYTGWGRLSRKLINGIRDKQSGKTILDFLKSDFAN  
RNFMLIHDDSLTFKEDIQKAQVSGQDLSLHEHIANLAGSPAIAKKGILQTVKVVDELVKVMGRHKPENIVIEMARENQTTQ  
KGQKNSRERMKRIIEGKELGSQILKEHPVENTQLQNEKLYLYLQNGRDMYVDQELDINRLSDYDVDHIVPQSFLKDDSI  
DNKVLTRSDKNRGSNDNPSEEVVKKMKNYWRQLLNAKLITQRKFDNLTKAERGLSELKAGFIKRQLVETROITKHVAQ  
ILDSRMNTKYDENDKLIREVKVITLKSCLVSDFRKDFQFYKVIENNYHHAHDAYLNAVVGTAIIKKYPKLESEFVYGDYK  
VYDVRKMIKSEQEI GKATAKYFFYSNIMNFFKTEITLANGEIRKRPLIETNGETGEIVWDKGRDFATVRKVLSPQVNI  
KKTEVQTTGGFSKESILPKRNSDKLIARKKDWDPKYGGFDSPTVAYSVLVAKVEKGSKKLKSVELLGITIMERSSEFEK  
NPIDFLEAKGYKEVKKDLIIKLPKYSLFELENGRKRMLASAGELQKGNELALPSKYVNFYLYLASHYEKLGSPEDNEQKQL  
FVEQHKHYLDEIEQISEFSKRVLADANLDKVL SAYNKHDKPIREQAENIIHLFTLTNLGAPAAFKYFDTTIDRKRYTS  
TKEVLDTLIHQSI TGLYETRIDLSQLGGDKRPAATKKAGQAKKKYEFKASRSGETPGTSESATPESMETDTLLLWVLL  
LWVPGSTGDYPYDVPDYAGAQPASMAEAGITGTWYNQSGSTFTVTVTAGADGNLTGQYENRAQGTGCQNSPYTLTGRYNGTK  
LEWRVEWNNSTENCHSRTEWRGQYQGGAEARINTQWNLTYEGGSGPATEQGQDTFTKVKPSAASGS\*

SpyCas9-mSA\*: cMYC-NLS-SpyCas9-HA-mSA



MASPAAKRVKLDGGSGGGSGGGSGPAAKRVKLDGGSGGGSGGGSGPLEPAAKRVKLDKDKYSIGLDIGTNSVGVAVITDEY  
KVPSKFKVGLGNTDRHSIKKNLIGALLFDSGETAEATRLKRTARRRYTRRKNRICYLQEIFSNEMAKVDDSFHRLSEESFL  
VEEDKHERHPIFGNIVDEVAYHEKYPTIYHLRKKLVDSTDKADLRLIYLALAHMIKFRGHFLIEGDLNPDNSDVKLFIQ  
LVQTYNQLFEENPINASGVDAKAILSARLSKSRLENLIAQLPGEKKNLFGNLIALSLGLTPNFKSNFDLAEDAKLQLSK  
DTYDDDLNLLAQIGDQYADLFLAAKNLSDAILLSDILRVNTEITKAPLSASMIKRYDEHHQDLTLLKALVRQQLPEKYKE  
IFFDQSKNGYAGYIDGGASQEEFYKFIKPILEKMDGTEELLVKNLREDLLRQRTFDNGSIPHQIHLGELHAILRRQEDFY  
PFLKDNREKIEKILTFRIPIYVVGPLARGNSRFAMTRKSEETITPWNFEEVVDKGASAQSFIERMTNFDKNLPNEKVLPHK  
SLLYEYFTVYNELTKVKYVTEGMRKPAFLSGEQKKAIVDLLFKTNRKVTVKQLKEDYFKKIECFDSVEISGVEDRFNASLG  
TYHDLLKIKDKDFLDNEENEDILEDIVLTLTLFEDREMIEERLKYAHLFDDKVMKQLKRRRYTGWGRLSRKLINGIRDK  
QSGKTILDFLKSDGFANRNFMLIHDDSLTFKEDIQKAQVSGQDLSHEHIANLAGSPAIKKGIQTVKVVDELVKVMGRH  
KPENIVIAMARENQTTQKQKNSRERMKRIEEGIKELGSQILKEHPVENTQLQNEKLYLYLQNGRDMYVDQELDINRLSD  
YDVDHIVPQSFLKDDSIDNKVLRSDKNRGSNDNPSEEVVKKMKNYWRQLLNAKLITQRKFDNLTKAERGGLSELDKAGF  
IKRQLVETRQITKHVAQILDSRMNTKYDENDKLIREVKVITLKSCLVSDFRKDFQFYKVINNYHHAHDAYLNAVVGTA  
IKKYPKLESEFVYGDYKVYDVRKMIKSEQEI GKATAKYFFYSNIMNFFKTEITLANGEIRKRPLIETNGETGEIVWDKGR  
DFATVRKVLSPQVNIKKTEVQTGGFSKESILPKRNSDKLIARKDWDPKKYGGFDSPTVAYSVLVAKVEKGSKKLKS  
VKELGITIMERSSFENPIDFLEAKGYKEVKKDLIKLPKYSLFELENGRKRMLASAGELQKGNELALPSKYVNFYLYLAS  
HYEKLKGSPEQKQLFVEQHKHYLDEIIEQISEFSKRVILADANLDKVL SAYNKHDKP IREQAENI IHLFTLTLNLGAP  
AAFKYFDTTIDRKRYTSTKEVL DATLIHQSI TGLYETRIDLSQLGGDGTGGPKKKRVYPYDVPDYAGYPYDVPDYAGSYP  
YDVPDYAGSAAPAKKKKLD FESGEFGAQPARSMAEAGITGTWYNQSGSTFTVTAGADGNLTGQYENRAOQTGCQNSPYTL  
TGRYNGTKLEWRVEWNNSTENCHSRTEWRGQYQGGAEARINTQWNLTYEGGSGPATEQGQDTFTKVKPSAASGSPGGSTSS  
RGSAAPAAKRVKLDGGSGGGSGGGSGS GPAAKRVKLD\*

enAsCas12a-mSA: cMYC-NLS-Cas12a-HA-mSA

MASPAAKRVKLDGGSGGGSGGGSGPAAKRVKLDGGSGGGSGGGSGPLETQFEGFTNLYQVSKTLRFELI PQGKTLKHIQEQ  
GFIEEDKARNHDHYKELKPIIDRIYKTYADQCLQLVQLDWEENLSAAIDSYRKEKTEETRNLIEEQATYRNAIHDFIGRTD  
NLTDAINKRHAEIYKGLFKAELFNGKVLKQLGTVTTEHENALLRSFDKFTTYFSGFYRNRKNVFAEDISTAIPHRIVQD  
NFPKFENCHIFTRLITAVPSLREHFENVKKAIGIFVSTSI EEVFSFPFYNQLLTQTQIDLYNQLLGGISREAGTEKIKGL  
NEVLNLAIQKNDETAHIIASLPHRFIPLFKQILSDRNTLSFIEEFKSDEEVIQSFCYKTLRNENVLETAEALFNELENS  
IDLTHIFISHKKLETISSALCDHWDTLRNALYERRISELTGKITKSAKEKVORSLKHEDINLQEIISAAGKELSEAFKQKT  
SEILSHAAALDQPLPTTLKKQEEKEILKSQDLSLLGLYHLLDWF AVDESNEVDPEFSARLTGIKLEMEPSLSFYNKARNY  
ATKKPYSVEKFKLNFQMPTLARGWDVNREKNGAILFVKNGLYLGLIMPQKGRYKALSFEPTTEKTSSEGFDMYDYFPA  
AKMIPKSTQLKAVTAHFQHTTTPILLSNFIEPLEITKEIYDLNPEKEPKKFQATAYAKKTGDQKGYREALCKWIDFTRD  
FLSKYTKTTSIDLSSLRPSSQYKDLGEYYAELNPLLYHISFORIAEKEIMDAVETGKLYLFOIYNKDFAKGHHGKPNLHTL  
YWTGLFSPENLAKTSIKLNGQAELEFYRPKSRMKRMAHRLGEKMLNKKLKDQKTPIDPTLYQELYDYVNHRLSHDLSDEARA  
LLPNVITKEVSHEIKDRRFTSDKFFHVPITLNYQAANSPSKFNQRVNAYLKEHPETPIIGIDRGERNLIYITVIDSTGK  
ILEQRSNTIQQFDYQKLDNREKERVAARQAWSVVGTIKDLKQGYLSQVIHEIVDLMIHYQAVVLENLNFQFKSKRTGI  
AEKAVYQQFEKMLIDKLNCLVLKDYPAEKVGVLNPNYQLTDQFTSFAKMGTSQSGFLFYVPAPYTSKIDPLTGFVDPFVWKT  
IKNHESRKHFLLEGDFLHYDVKTGDFILHFKMNRNLSFORGLPGFMPAWDIVFEKNETQFDAQGTPFIAGKRIVPVIENHR  
FTGRYRDLYPANELIALLEEKGI VFRDGSNILPKLLENDSDHAIDTMVALIRSVLQMRNSNAATGEDYINSPVRDLNGVCF  
DSRFQNPPEWPMADANGAYHIALKGQLLNLHLESKDLKLQNGISNQDWLAYIQELRNGTGGPKKKRVYPYDVPDYAGYP  
YDVPDYAGSYPYDVPDYAGSAAPAKKKKLD FESGEFGAQPARSMAEAGITGTWYNQSGSTFTVTAGADGNLTGQYENRAQ  
GTGCQNSPYTLTGRYNGTKLEWRVEWNNSTENCHSRTEWRGQYQGGAEARINTQWNLTYEGGSGPATEQGQDTFTKVKPSA  
ASGSPGGSTSSRGSAAPAAKRVKLDGGSGGGSGGGSGS GPAAKRVKLD\*

SauCas9-mSA: cMYC-NLS-SauCas9-HA-mSA

MASPAAKRVKLDGGSGGGSGGGSGPAAKRVKLDGGSGGGSGGGSGPLEIHGVPAAKRNYILGLDIGITSVGYGIIIDYETRD  
VIDAGVRLFKEANVENNEGRRSKRGARLRKRRRRHRIQRVKKLLFDYNLLTDHSELGINPYEARVKGLSOKLSEEEFSAA  
LLHLAKRRGVHNVNEVEEDTGNELSTKEQISRNSKALEEKYVAELQLERLKKDGEVRSINRFKTSYVKEAKQLLKVQKA  
YHQLDQSFIDTYIDLLETTRTYEGPGEPSFGWKDIKEWYEMLMGHCTYFPEELRSVKYAYNADLYNALNDLNNLVI TRD  
ENEKLEYEYEFQI IENVFKQKKKPTLQIAKEILVNEEDIKGYRVTSTGKPEFTNLKVYHDIKDITARKEI IENAELLDQI  
AKILTIYQSSEDIQEELTNLNSLTQEEIEQISNLKGYTGTHNLSLKAINLILDELWHTNDNQIAIFNRLKLVPKKVDLSQ  
QKEIPTTLVDDFILSPVVKRSFIQSIVKINAI IKKYGLPNDII IELAREKNSKDAQKMINEMQKRNRQTNERIEEIRTG  
KENAKYLI EKIKLHDMQEGKCLYSLEAIPLEDLLNPNFYEVVDHIIPRSVSFDNSFNKVLVKQEENSCKGNRTPFQYLLS  
SDSKISYETFKKHILNLAKGKGRI SKTKKEYLLEERDINRFSVQKDFINRNLVDTRYATRGLMNLRSYFRVNNLDVKVKS  
INGGFTSFLRRKWKFKERNKGYKHAEDALI IANADFIKWKKLDKAKKVMENQMFEEKQAESMPEIETEQEYKEIFIT

PHQIKHIKDFKDYKYSHRVDKKNRELINDTLYSTRKDDKGNTLIVNNLNGLYDKDNDKLLINKSPEKLLMYHHDPTQY  
QKLKLIMEQYGDEKNPLYKYYEETGNYLTKYSKKDNGPVIKKIKYYGNKLNALHDITDDYPNSRNKVVKLSLKPYRFDVYL  
DNGVYKFVTVKNLDVIKKENYYEVNSKCYEEAKKLLKISNQAEFIASFYNNDLIKINGELYRVIGVNNDLLNRIEVMIDI  
TYREYLENMNDKRPPRIIKTIASKTQSIKKYSTDILGNLYEVKSKKHPQIIKKGGTGGPKKKRKYYPYDVPDYAGYPYDVP  
DYAGSYPYDVPDYAGSAAPAAKKKKLDFESGEFGAQPARSMAEAGITGTWYNQSGSTFTVTAGADGNLTGOYENRAQGTGC  
QNSPYTLTGRYNGTKLEWRVEWNNSTENCHSRTEWRGQYQGGAEARINTQWNLTYEGGSGPATEQGQDTFTKVKPSAASGS  
PGGSTSSRGSAAAPAAKRVKLDGGSGGGSGGGSGGPAAKRVKLD\*

**Supplementary Note 1. FACS gating examples for GFP-positive cells.**

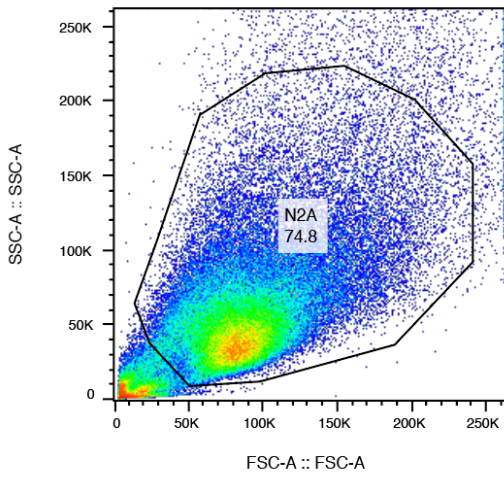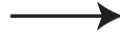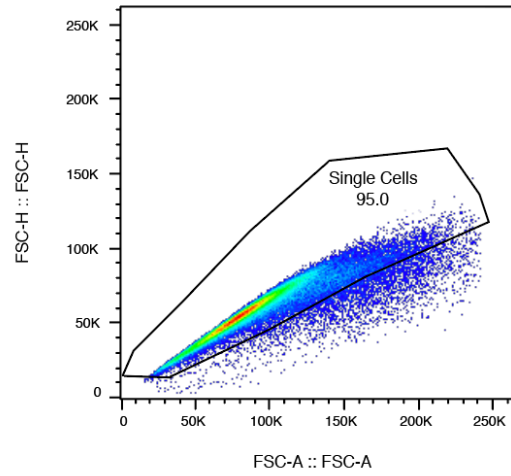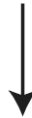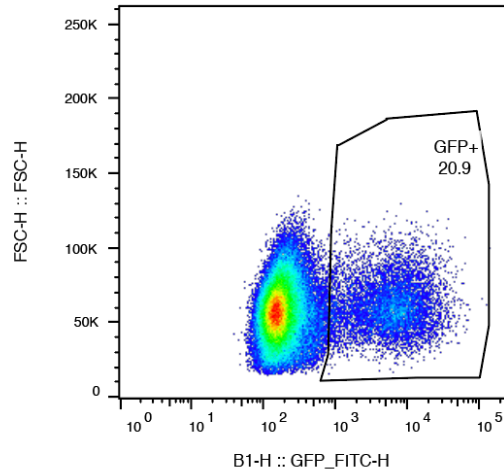

FACS gating examples for tdTomato-positive cells from mouse lung.

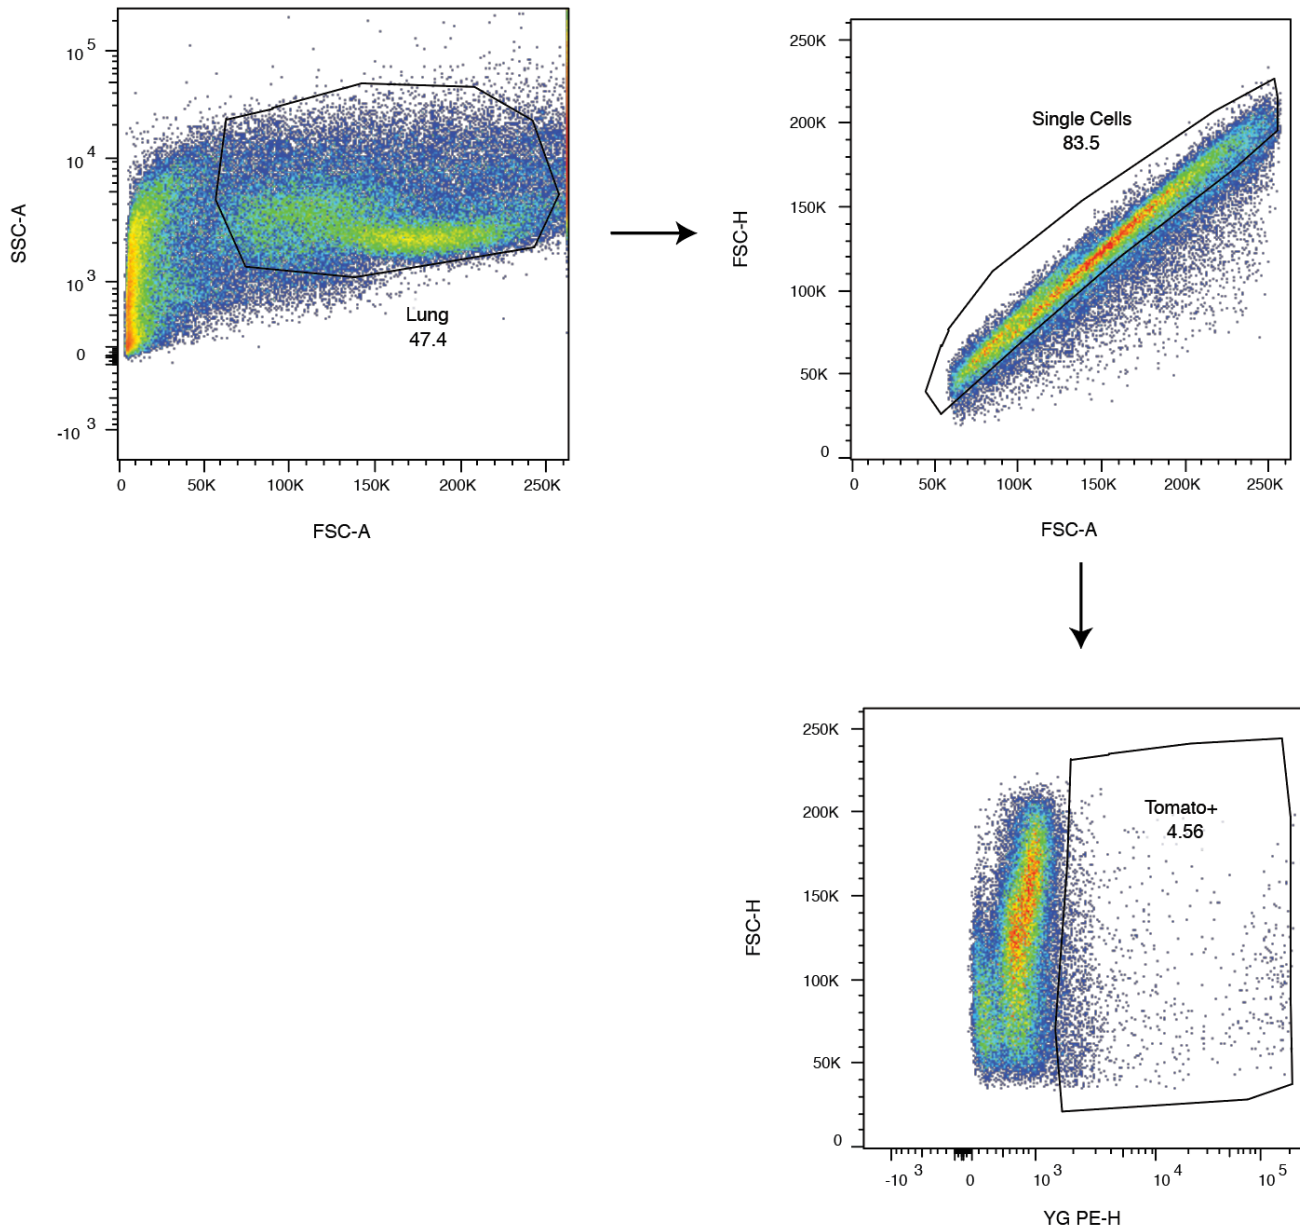

Supplement: 41467_2022_28135_MOESM1_ESM.pdf [file 41467_2022_28135_MOESM1_ESM.pdf]
